# Supplementary material for: A new ancient lineage of ablepharine skinks (Sauria: Scincidae) from eastern Himalayas with notes on origin and systematics of the group
Source: PeerJ journal article supplement (doi:10.7717/peerj.12800), 2022-01-18
Supplement: Sequence_file.pdf [file Sequence_file.pdf]

## SEQUENCES OF SKINKS NEWLY GENERATED FOR THE PRESENT STUDY

(NB: For each sequence the GenBank Accession Number, museum voucher ID and the species name is provided, for details see Supplementary Table S1).

>NHMC80.3.131.57\_Ablepharus\_anatolicus

ATTGTCCGCCAGAGAACTACGAGCGTAAAACCTTAAA  
ACTCCAAGGACTTGCGGTGCCCCACACCAACCTAGAGGAGCCTGTCCTATAATCGATAC  
TCCACGT-TCAACCTTACCCCCCTAGT-AAACCCAGCCTATATACCGCCGTCGACAGCC  
CACCTTATGA-AAGAAA-CCAAGTGAGCACAATAATTAACAATAACGTCAGGTCAAG  
GTGTAGCACACGG-GTGGGACAGAGATGGGCTACATTCCTCT-AACAGGAAACACGCACA  
GTGTGTTGAAAC-ACACACTTAAAGGCGGATTTAGCAGTAAGACAGATAA-GAA--TACC  
TGTCTC-AAACTTGCTCTGGGGCGCGCACACACCGCCCGT-

>NHMC80.3.131.8\_Ablepharus\_budaki

ACTGTTCCGCCAGAGAACTACGAGCGAAAACTTAAA  
ACTCTAAGGACTTGCGGTGCCCCATACCAACCTAGAGGAGCCTGTCCTATAATCGATAC  
TCCGCGC-TAAACCTCACCCCCCTTGT-AAACCCAGCCTATATACCGCCGTCGACAGCT  
CACCTTATGA-AAGAAT-CCAAGTGAGCATAATAGTTAACAACCAATACGTCAGGTCAAG  
GTGTAGCACACGG-GGGGACAGAGATGGGCTACATTCCTAC-AATAGGAAACACGCACG  
GCACGCTGAAAC-ATGCGCCCAAAGGTGGATTTAGCAGTAAGACAGATAA-GAA--GGCC  
TGTCTCAAACTTGCTCTGGGGCGCGCACACACCGCCCGT-

>BAM-36\_Ablepharus\_deserti

ATTGTTCCGCCAGAGAACTACAAGCGAAAACTTAAA  
ACTCCAAGGACTTGCGGTGCCCCACACCAACCTAGAGGAGCCTGTCCTATAATTGATAC  
TCCACAC-TAAACCTTACCCCCCTTGA-TAACCCAGCCTATATACCGCCGTCGCCAGCC  
TACCTTGTGA-AAGGAG-CCCAGTGGGCACAATAATTAACAATTAACACGTCAGGTCAAG  
GTGTAGTACATGG-GGCGGTAGAGATGGGCTACATTCCTTT-AACAGGAGACACGCACA  
GTGGGTTGAAAC-GCCCACTTAAAGGTGGATTTAGCAGTAAGACATGTAA-GAA--ACCA  
TGTCTC-AAACCTGCTCTGGGACGCGCACACACCGCCCGT-

>R-14554\_Ablepharus\_pannonicus

ACTGTTCCGCCAGAGAACTACGAGCGAAAACTTAAA  
ACTCCAAGGACTTGCGGTGCCCCACACCAACCTAGAGGAGCCTGTCCTATAATCGATAC  
TCCACGC-TTAACCTTACCCACCCTTG--AAACTCAGCCTATATACCGCCGTCGACAGCC  
TACCTTGTGA-AAGTAA-ATAAGTTGGCACAATAGTTAATAACTAACACGTCAGGTCAAG  
GTGTAGCACATGG-GCGGGTAGAGATGGGCTACATTCCTAA-TATAGGAAACACGCACA  
GTGCAATGAAAT-ATGCACCTTAAAGGTGGATTTAGCAGTAAGACAAACAA-GAACCCCC  
TGCCTA-AAACCTGCTCTGGGGCGCGCACACACCGCCCGT-

>BAM-1111\_Ablepharus\_kitaibelii

ATTGTTCCGCCAGAGAACTACAAGTGAAAACTTAAA  
ACTCCAAGGACTTGCGGTGCCCCATATCAACCTAGAGGAGCCTGTCCTATAATCGATAC  
TCCACGC-TTAACCCACCCCCCTTTG--AAATACAGCCTATATACCGCCGTCGCCAGCC  
CACCTTATGA-AAGAAA-TTCAGTGGGCACAATAGTTAACAATAACGTCAGGTCAAG  
GTGTAGCACATGA-GGGGGACAGAGATGGGCTACATTCCTAC-AACAGG-AACACGCACG  
GCATATTGAAAT-ATATACCCCAAGGCGGATTTAGCAGTAAGACAAACAA-GAC--AAAC  
TGTCTT-AAACCTGCTCTGGGACGCGCACACACCGCCCGT-

>NHMC80.3.82.2\_Ablepharus\_kitaibelii

ATTGTTCCGCCAGAGAACTACGAGTGAAAACTTAAA  
ACTCTAAGGACTTGCGGTGCCCCATATCAACCTAGAGGAGCCTGTCCTATAATCGATAC

TCCACGC-TTAACCTTACCCCTTTTG--AAACACAGCCTATATACCGCCGTCGCCAGCC  
CACCTTATGA-AAGAAA-TTCAGTGGGCATAATAGTTAACAACTAATACGTCAGGTCAAG  
GTGTAGCACATGG-GGGGGCAGAGATGGGCTACATTTCTCC-AACAGGAAACACGCACG  
GCACACTGAAAT-ATATGCCCTAAGGCGGATTTAGCAGTAAGACAAACAA-GAC-AAACC  
TGTCTT-AAACCTGCTCTGGGACGCGCACACACCGCCCGT-

>NHMC80.3.169.5\_Ablepharus\_rueppellii

ACTGTTCCGAGAGAACTACGAGCGAAAACTTAAA  
ACTCTAAGGACTTGCGGTGCCCCACACCAGCCTAGAGGAGCCTGTCCTATAATCGATAC  
TCCGCGT-TAAACCTTACCCCTCTTGT-AAACCCAGCCTATATACCGCCGTCGACAGCT  
CACCTTGTGA-AAGACA-CTTAGTGGGCACAACAATTATCAACTAATACGTCAGGTCAAG  
GTGTAGCACACGA-GGGGGCAGAGATGGGCTACATTTCTCT-AACAGGAAACACGCACG  
ACATGCTGAAAC-ACATGCCCAAAGGCGGATTTAGCAGTAAGACAGATAA-GAA--GACC  
TGTCTC-AAACCTGCTCTGGGGCGCGCACACACCGCCCGT-

>BAM-15\_Asymblepharus\_eremchenkoi

GCTGTCCGCTGAGAACTACAAGCGTAAAGCTTAAA  
ACTCCAAGGACTTGCGGTGCTCCATATCAACCTAGAGGAGCCTGTCCTATAATCGATAC  
TCCACGC-TCAACCTTACCCCTCTTG--AAACCCAGCCTATATACCGCCGTCACCAGCC  
CACCTTATGA-GAGAAT-TTAAGT GAGCACAATAATTATTA ACTAACACGTCAGGTCAAG  
GTGTAGCACACGC-GGGGGCAGAGATGGGCTACATTTCTTA-TACAGGAAACACGAACA  
GTGTTCTGAAAC-ACCCACTCGAAGGCGGATTTAGCAGTAAGACAAATAA-GAA--CCCT  
TGTCTA-AAACCTGCTCTGGAGCGCGCACACACCGCCCGT-

>BAM-135\_Asymblepharus\_alaicus

ATTGTTCCGCTGAGAACTACAAGCGTAAACTTAAA  
ACTCCAAGGACTTGCGGTGCTCCATATCAACCTAGAGGAGCCTGTCCTATAATCGATAC  
TCCACGC-TTAACCTTACCCCTCTTG--AAACCCAGCCTATATACCGCCGTCACCAGCC  
CACCTTATGA-AAGAAG-TTAAGT GAGCACAACAATTATAACTAACACGTCAGGTCAAG  
GTGTAGCACACGC-GGGGGCAGAGATGGGCTACATTTCTTC-TA-AGGAAACACGAACA  
GTGTTATGAAAC-ACCCACTCGAAGGCGGATTTAGCAGTAAGACAAATAA-GAA--TCC  
TGTCTC-AAACCCGCTCTGGAGCGCGCACACACCGCCCGT-

>KIZ015959\_Asymblepharus\_ladacensis

ACTATTCGCCAGAGAACTACAAGCGAAAACTTTAA  
ACTCCAAGGACTTGCGGTGCTCCACACCAGCCTAGAGGAGCCTGTCCTATAATCGATAT  
TCCACGC-TCAACCTTACCCCTCTTG--AAACTCAGCCTATATACCGCCGTCGCCAGCC  
TACCTTATGA-AAG-GA-TAAAGTGAGCACAATAGTTAACAACTAATACGTCAGGTCAAG  
GTGTAGCACACGG-G-GGGAGAGATGGGCTACATTTCTCC-CACAGGGAA-ACGAACA  
GTGTATTGAAAT-ACACACTCAAAGGTGGATTTAGCAGTAAACAAATTA-TAC--CCCT  
TTATTT-CAATATGCTCTGGAGCGCGCACACACCGCCCGT-

>NAP-9870\_Asymblepharus\_nepalensis

ACTGTTCCGAGAGAACTACAAGCGAAAACTTAAA  
ACTCCAAGGACTTGCGGTACTCCACATCAACCTAGAGGAGCCTGTCCTATAATCGATAC  
TCCACGT-TAAACCTTACCACCCCTTG--AAACACAGCCTATATACCGCCGTCGACAGCC  
CACCTTATGA-AAGACA-CCAAGTGAGCACAATAGCTAGCAGTTAATACGTCAGGTCAAG  
GTGTAGCACACGG-GGTGGCAGCGATGGGCTACATTTCTAC-AACAGGACATACGAACG  
GCATACTGAAAT-ACCCACCTAAAGGCGGATTTAGCAGTAAACAAATAA-GAG--TTAT  
TGTTTT-AAACCTGCTCTGGAGTGGCGCACACACCGCCCGT-

>NAP-9807\_Asymblepharus\_mahabharatus

ACTGTTCCGAGAGAACTACAAGCGAAAACTTAAA  
ACTCTAAGGACTTGCGGTGCTCCATACCAACCTAGAGGAGCCTGTCCTATAATCGATAC

CCCACGC-TCAACCTTACCCCCCTAA-AAACACAGCCAATATACCGCCTTCCCCAGCC  
TACCTAATGA-AAAAAA-TTAGTTGAGCACAATAATTAACAAGTACACTTCAGGTCAAG  
GGGTGCCAAAGGG-GGCGGCAAAAATGGGCTACTTTTCCTCC-TACAGGAAATACTTACA  
GGGTAAGGAAAC-ACCCACCTTAAGGGGGATTACCATTAAACCAACCTA-CCA--TTAT  
GGTTTC-AAACCGGCTCTGGAGCGCGCACACCCCGCCCGC-

>AY607282\_Asymblepharus\_mahabharatus

ACTGTTCCGCGAGAACTACAAGCGAAAACTTAAA  
ACTCTAAGGACTTGCGGTGCTCCATACCAACCTAGAGGAGCCTGTCCTATAATCGATAC  
CCCACGC-TCAACCTTACCCCCCTAA-AAACACAGCCAATATACCGCCTTCCCCAGCC  
TACCTAATGA-AAAAAA-TTAGTTGAGCACAATAATTAACAAGTACACTTCAGGTCAAG  
GGGTGCCAAAGGG-GGCGGCAAAAATGGGCTACTTTTCCTCC-TACAGGAAATACTTACA  
GGGTAAGGAAAC-ACCCACCTTAAGGGGGATTACCATTAAACCAACCTA-CCA--TTAT  
GGTTTC-AAACCGGCTCTGGAGCGCGCACACCCCGCCCGC-

>NAP-9840\_Asymblepharus\_sikkimensis\_2

ACTGTTCCGCGAGAACTACAAGCGAAAACTTAAA  
ACTCTAAGGACTTGCGGTGCTCCATATCAACCTAGAGGAGCCTGTCCTATAATCGATAC  
CCCACGC-TACACCTCACCACCCCTAG--AAACCCAGCCTATATACCGCCGTCGACAGCC  
TACCTTATGA-GAGAAA-TTCAGTAGGCACAACAATTAGTAACTAATACGTCAGGTCAAG  
GTGTAGCATATGG-GGTGGTAGAGATGGGCTACATTTCTCC-AACAGGAAATACGCACA  
GTGTACTGAAAC-ACCCACCCAAAGGCGGATTTAGCAGTAAGACAAAATAA-GCA--TTAT  
TGCCCTC-AAACCTGCTCTGGAGCGCGCACACACCCGCCCGT-

>NAP-9816\_Asymblepharus\_sikkimensis\_3

ACTGTTCCGCGAGAACTACAAGCGAAAACTTAAA  
ACTCTAAGGACTTGCGGTGCTCCATATCAACCTAGAGGAGCCTGTCCTATAATCGATAC  
CCCACGC-TAACCTCACCACCCCTAG--AAACCCAGCCTATATACCGCCGTCGACAGCC  
TACCTTATGA-AAGAAA-TTCAGTAGGCACAACAATTAGCAACTAATACGTCAGGTCAAG  
GTGTAGCATATGG-GGTGGTAGAGATGGGCTACATTTCTAC-AACAGGAAATACGCACA  
GTGTACTGAAAT-ACCCACCCAAAGGCGGATTTAGCAGTAAGACAAAATAA-GCA--TTAT  
TGCCCTC-AAACCTGCTCTGGAGCGCGCACACACCCGCCCGT-

>NAP-9858\_Asymblepharus\_sikkimensis\_1

ACTGTTCCGCGAGAACTACAAGCGAAAACTTAAA  
ACTCTAAGGACTTGCGGTGCTCCATATCAACCTAGAGGAGCCTGTCCTATAATCGATAC  
CCCACGC-TACACCTCACCACCCCTAG--AAACCCAGCCTATATACCGCCGTCGACAGCC  
TACCTTATGA-GAGAAA-TTCAGTAGGCACAACAATTAATAACTAATACGTCAGGTCAAG  
GTGTAGCATATGG-GGTGGTAGAGATGGGCTACATTTCTCC-AACAGGAAATACGCACA  
GTGTACTGAAAC-ACCCACCCAAAGGCGGATTTAGCAGTAAGACAAAATAA-GCA--TTAT  
TGCTC-AAACCTGCTCTGGAGCGCGCACACACCCGCCCGT-

>ZM146\_Protoblepharus\_sp.nov.

AAAAAAAAACAGTAAAACCACAGTACTGTTCCGCGAGAACTACAAGCGAAAACTTAAA  
ACTCTAAGGACTTGCGGTGCTCCACACCGACCTAGAGGAGCCTGTCCTACAATCGATAC  
CCCACGT-TCAACCTCACCCTCTTG--AAAACCAGCCTATATACCGCCGTCGACAGCC  
TACCTTATGA-AAGAAA-TAAAGTGAGCATAACAGTTATTAAGTACGTCAGGTCAAG  
GTGTAGCAAACGA-GGCGGAGAGATGGGCTACATTTCTAC-CACAGGAAAAACGAACA  
GCGTGCTGAAAC-ATACACTTGAAGGCGGATTTAGCAGTAAGATAAACAA-GAG--ATGC  
TATCTA-A-

>BAM-36\_Ablepharus\_deserti

---GCCAGTGAAA--TATTCAACGGCCGCGG-TATTCTAACCGTGCAAAGGTAGCGTAATCA  
CTTGCTTCCAAATAAAGACCAGTATGAA-CGGCTAATGAGGACAAACCTGTCTCCTGC

GACCGATCAGTGAAATTGATCTTCTGGTGCAAAAAGCCAGAATAATCACATAAGACGAGAA  
GACCCTGTGGAGCTTAAAATCTAT-TATTACCTAAA-ACTAATATTAATTTAAGTTGGG  
GCGACTTCGGAATAAAACAAAACCTCCGAGCAAGGA-GAC-ATA-T---AC-TCCA-AA-  
TA-AGGCCACAAGCC-AT---TAGCCGACCCAGT-CACACT--GATCAACGAACC  
AAGTTACCCAGGGATAACAGCGCAATCCCCTTCAAGAGTCCATATCGACAAGGGGGTTT  
ACGACCTCGATGTTGGATCAGGACACCCCAATGGTGCACCGCTATTAAGGTTTCGTTTG  
TTCAACGATTAATAGTCCTACGTGATCTG

>BAM-1111\_Ablepharus\_kitaebelii

---GCCCA

GTGAAA--CATTTAACGGCCGCGG-TATTCTAACCGTGCAAAGGTAGCGTAATCA  
CTTGTCTTCAAATAGAGACCAGTATGAA-TGGCTAAATGAGGGCAAACCTGTCTCCTGC  
ACCCAATCAGTGAAATTGATCTCCTGGTACAAAAGCCAGAATAATTACATAAGACGAGAA  
GACCCTGTGGAGCTTAAAATTTAT-AACTACC-AAA-ACTAGTATTAAATTTAAGTTGGG  
GCGACTTCGGAACAAAACAAAACCTCCGAGCTAGGA-GTT-ATT-T---AC-TCCT-AA-  
TA-AGGCCACAAGCC-AA---CAACCGACCCAGT-CACACT--GATCAACGAACC  
AAGTTACCCAGGGATAACAGCGCAATCCCCTCCAAGAGTCCGTATCGACAAGGGGGTTT  
ACGACCTCGATGTTGGATCAGGACACCCCAATGGTGCAGCCGCTATTAAGGTTTCGTTTG  
TTCAACGATTAATAGTCCTACGTGATCTG

>R-14554\_Ablepharus\_pannonicus

---GCCCA

GTGAAG--TATTTAACGGCCGCGG-TATTCTAACCGTGCAAAGGTAGCGTAATCA  
CTTGTCTTCTAAATAAAGACCAGTATGAA-TGGCTAAATGAGGACAGACCTGTCTCCTGC  
ACCCAATCAGTGAAATTGATCTTCTGGTCCAAAAGCCAGAATATTTCCACAAGACGAGAA  
GACCCTGTGGAGCTTAAAATTTAA-TGCTACTTTAA-ATTAGCACTCATTTAAGTTGGG  
GCGACTTCGGAACAAAACAAAACCTCCGAGCAAGGA-GCC-ACC-C---AC-TCCT-AA-  
TA-AGGCTTACACGCC-AA---CAACAGACCCAGT-CATACT--GATCAACGAACC  
AAGTTACCCAGGGATAACAGCGCAATCCCCTTCAAGAGTCCATATCGACAGGGGGTTT  
ACGACCTCGATGTTGGATCAGGACACCCAGATGGTGCAGCCGCTATCAAAGGTTTCGTTTG  
TTCAACGATTAATAGTCCTACGTGATCTG

>BAM-15\_Asymblepharus\_eremchenkoi

---GCCCA

GTGAAC--TATTTCAACGGCCGCGG-TATTCTAACCGTGCAAAGGTAGCGTAATCA  
CTTGTCTTCTAAATAAAGACCAGTATGAA-TGGCTAAATGAGGGCAAACCTGTCTCCTGC  
GCCCAATCAGTGAAACTGATCTTCTGGTACAAAAGCCAGAATAATAACATAAGACGAGAA  
GACCCTGTGGAGCTTAAACTTAT-GCCTACATAAAA-CCTAGGCCAAGTTTTAAGTTGGG  
GCGACTTCGGAATAAAACAACACTTCCGAGCAAGGG-ACT-ATC-A---GTCTCCA-AA-  
TA-AGGCCACAAGCC-GAC--TAGCCGACCCAGT-CATACT--GATCAACGAACC  
AAGTTACCCAGGGATAACAGCGCAATCCCCCTCAAGAGTCCCTATCGACAGGGGGTTT  
ACGACCTCGATGTTGGATCAGGACACCCCAATGGTGCAGCAGCTATTAAGGTTTCGTTTG  
TTCAACGATTAACAGTCCTACGTGATCTG

>BAM-135\_Asymblepharus\_alaicus

---GCCCA

GTGAAC--TATTTCAACGGCCGCGG-TATTCTAACCGTGCAAAGGTAGCGTAATCA  
CTTGTCTTCTAAATAAAGACCAGTATGAA-TGGCTAAATGAGGGCAAACCTGTCTCCTGC  
GCCCAATCAGTGAAACTGATCTTCTGGTACAAAAGCCAGAATAATAACATAAGACGAGAA  
GACCCTGTGGAGCTTAAACTTAC-GCCTACATAAAA-CCTAGGCCAATTTAAGTTGGG  
GCGACTTCGGAATAAAACACCACTTCCGAGCAAGGA-GCT-ATA-A---ACCTCCA-AA-  
CA-AGGCCACAAGCC-GAC--TAGCCGACCCAGT-CATACT--GATCAACGAACC  
AAGTTACCCAGGGATAACAGCGCAATCCCCCTCAAGAGTCCATATCGACAGGGGGTTT  
ACGACCTCGATGTTGGATCAGGACACCCCAATGGTGCAGCAGCTATTAAGGTTTCGTTTG

TTCAACGATTAATAGTCCTACGTGATCTG

>NAP-9807\_Asymblepharus\_mahabharatus

--TTTCAACGGCCGCGG-TATTCTAACCGTGCAAAGGTAGCGTAATCA  
CTTGCTTTCTAAATAAAGACCAGTATGAA-TGGCTAAATGAGGACAAACCTGTCTCCTGC  
ACCCAATCAGTGAAATTGATCTTCTAGTACAAAAGCTAGAATAATCACATAAGACGAGAA  
GACCCTGTGGAGCTTAAAA-TTAT-GACTACCACAA-CCTAGTCTGAATTTTGAGTTGGG  
GCGACTTCGGAACAAAATAAACCTTCCGAGCAAGGA-ATA-AAT---ATTCC-AA-  
CA-AGGCAAACAAGCC-GA---CAGCCGACCCAGT-CACACT--GATCAACGAACC  
AAGTTACCCCAGGGATAACAGCGCAATCCCCTTCAAGAGTCCCTATCGACAAGGGGGTTT  
ACGACCTCGATGTTGGATCAGGACACCCCAATGGTGTAGCCGCTATTAATGGTTCGTTTG  
TTCAACGATTAACAGTCCTACGTGATCTG

>NAP-9870\_Asymblepharus\_nepalensis

--TTTAAACGGCCGCGG-TATTCTAACCGTGCAAAGGTAGCGTAATCA  
CTTGCTTTCTAAATAAAGACCAGTATGAA-TGGCTAAATGAGGACAAACCTGTCTCCTGT  
GACCAATCAGTGAAACTGATCTTCCGGTACAAAAGCCGGAATAACCCCATAGACGAGAA  
GACCCTGTGGAGCTTAAAA-TTAT-AACTACCTAAA-ACTAGCACTAATTTAAGTTGGG  
GCGACTTCGGAACCAAATAAACTTCCGAGCAAAGA-ACC-AGC-A-ATTCC-AA-  
CA-AGGCCTACATGCC-AT---GAGCCGACCCAGT-CACACT--GATCAACGAACC  
AAGTTACCCCAGGGATAACAGCGCAATCCCCCAAGAGTCCATATCGACGGGGGGTTT  
ACGACCTCGATGTTGGATCAGGACATCCCAATGGTGCACCCTATTAAAGGTTTCGTTTG  
TTCAACGATTAATAGTCCTACGTGATCTG

>NAP-9840\_Asymblepharus\_sikkimensis\_2

--TTTAAACGGCCGCGG-TATTCTAACCGTGCAAAGGTAGCGTAATCA  
CTTGCTTTCTAAATAAAGACCAGTATGAA-TGGCTAAATGAGGACAAACCTGTCTCCTGC  
ACCCAATCAGTGAAACTGATCTTCCAGTACAAAAGCTGGAATAATCACATAAGACGAGAA  
GACCCTGTGGAGCTTAAAAATTTAT-AACTACTTTAA-CCTAGTACAAATTTAAGTTGGG  
GCGACTTCGGAACAAAATAAACTTCCGAGCAAAGA-GTA-TTACTCC-AA-  
CA-AGGCCTACAAGCC-GA---CAGCCGACCCAGT-CATACT--GACCAACGAACC  
AAGTTACCCCAGGGATAACAGCGCAATCCCCTTCAAGAGTCCCTATCGACAAGGGGGTTT  
ACGACCTCGATGTTGGATCAGGACACCCCAATGGTGCAGCCGCTATTAAAGGTTTCGTTTG  
TTCAACGATTAATAGTCCTACGTGATCTG

>NAP-9816\_Asymblepharus\_sikkimensis\_3

--TTTAAACGGCCGCGG-TATTCTAACCGTGCAAAGGTAGCGTAATCA  
CTTGCTTTCTAAATAAAGACCAGTATGAA-TGGCTAAATGAGGACAAACCTGTCTCCTGC  
ACCCAATCAGTGAAACTGATCTTCCAGTACAAAAGCTGGAATAATCACATAAGACGAGAA  
GACCCTGTGGAGCTTAAAAATTTAT-GACTACTTTCA-CCTGGTACAAATTTAAGTTGGG  
GCGACTTCGGAACAAAATAAACTTCCGAGCAAAGA-GCA-TTACTCC-AA-  
CA-AGGCCTACAAGCC-AA---TAGCCGACCCAGT-CACACT--GACCCGACGAACC  
AAGTTACCCCAGGGATAACAGCGCAATCCCCTTCAAGAGTCCCTATCGACAGGGGGTTT  
ACGACCTCGATGTTGGATCAGGACACCCCAATGGTGCAGCCGCTATTAAAGGTTTCGTTTG  
TTCAACGATTAATAGTCCTACGTGATCTG

>NAP-9858\_Asymblepharus\_sikkimensis\_1

--TTTAAACGGCCGCGG-TATTCTAACCGTGCAAAGGTAGCGTAATCA  
CTTGCTTTCTAAATAAAGACCAGTATGAA-TGGCTAAATGAGGACAAACCTGTCTCCTGC

ACCCAATCAGTGAAACTGATCTTCCAGTACAAAAGCCGGAATAATCACATAAGACGAGAA  
GACCCTGTGGAGCTTGAATTTAT-AGCTACTTTAA-CCTAGTACAAATTTAAGTTGGG  
GCGACTTCGGAACAAAACAAAACCTCCGAGCAAGGA-GTA-TTACTCC-AA-  
CA-AGGCCTACAAGCC-AA---TAGCCGACCCAGT-CATACT--GATCAACGAACC  
AAGTTACCCCAGGGATAACAGCGCAATCCCCTTCAAGAGTCCTTATCGACAGGGGGGTTT  
ACGACCTCGATGTTGGATCAGGACACCCCAATGGTGCAGCCGCTATTAAAGGTTGTTT  
TTCAACGATTAACAGTCCTACGTGATCTG

>ZM146\_Protoblepharus\_sp.nov.

CGCCTGTTTATCAAAAACATAGCCTTTAGCAAAAACAAGTATTAAAGGTCTCGCCTGCCCA  
GTGAAA--CATTTAAACGGCCGCGG-TATTCTAACCGTGCAAAGGTAGCGTAATCA  
CTTGTCTTCTAAATAAAGACCAGTATGAA-CGGCTAAATGAGGACAAATCTGTCTCCTGC  
AACCAATCTGTGAAATTGATCTTCCCGTACAAAAGCTGGAATAACCACATAAGACGAGAA  
GACCCTGTGGAGCTTAAAATCAAC-TGCTACACAAA-CTAGCATAAGATTTTAGTTGGG  
GCGACTTCGGAACAAAATAAAACCTCCGAGCACGGA-ACC-ACC-ACTTCC--AA-  
AA-AGGCCTACGAGCC-AA---GCACTGACCCAGT-CACACT--GATCAACGAACC  
AAGTTACCCCAGGGATAACAGCGCAATCCCCTTCAAGAGTCCATATCGACAAGGGGGTTT  
ACGACCTCGATGTTGGATCAGGACACCCAAATGGTGCAGCCGCTA---

-

>ZM145\_Protoblepharus\_sp.nov.

--CCTGTTTTACAAAACATAGCCTTTAGCAAAAACAAGTATTAAAGGTCTCGCCTGCCCA  
GTGAAA--CATTTAAACGGCCGCGG-TATTCTAACCGTGCAAAGGTAGCGTAATCA  
CTTGTCTTCTAAATAAAGACCAGTATGAA-CGGCTAAATGAGGACAAATCTGTCTCCTGC  
AACCAATCTGTGAAATTGATCTTCCCGTACAAAAGCTGGAATAACCACATAAGACGAGAA  
GACCCTGTGGAGCTTAAAATCAAC-TGCTACACAAA-CTAGCATAAGATTTTAGTTGGG  
GCGACTTCGGAACAAAATAAAACCTCCGAGCACGGA-ACC-ACC-ACTTCC--AA-  
AA-AGGCCTACGAGCC-AA---GCACTGACCCAGT-CACACT--GATCAACGAACC  
AAGTTACCCCAGGGATAACAGCGCAATCCCCTTCAAGAGTCCATATCGACAAGGGGGTTT  
ACGACCTCGATGTTGGATCAGGACACCCAAATGGTGCAGCCGCTA---

-

>NAP-6640\_Scincella\_melanosticta

---GCCCA

GTGAAA--TTTTTAAACGGCCGCGG-TATTCTAACCGTGCAAAGGTAGCGTAATCA  
CTTGTCTTCTAAATAAAGACCAGTATGAA-CGGCTAAATGAGGATAAACCTGTCTCCTAC  
AACTAATCAGTGAAACTGATCTTCCAGTCCAAAAGCTGGAATTCCAACACAAGACGAGAA  
GACCCCGTGGAGCTTAAAGACGAAC-CACTAAT--AT-ACTAGAAAAAGTCTTAAGTTGGG  
GCGACTTCGGAACAAAATAAAACCTCCGAGCACAGA-GCC-ACA--C-CTCT-AA-  
CTAAGGCTAACAAAGCC-AAA--GAATTGACCCAGT-CATACT--GACTAACGAACC  
AAGTTACCCCAGGGATAACAGCGCCATCTTCTTCAAGAGTCCCTATCGACAAGAAGTTT  
ACGACCTCGATGTTGGATCAGGACACCCAAATGGTGAAGCCGCTATTAAAGGTTGTTT  
TTCAACGATTAACAGTCCTACGTGATCTG

>NAP-1331\_Scincella\_doriae

---GCCCA

GTGAAC--TTTT-TAACGGCCGCGG-TATTCTAACCGTGCAAAGGTAGCGTAATCA  
CTTGTCTTCTAAATAAAGACCAGTATGAA-CGGCTAAATGAGGGTGAACCTGTCTCCTAC  
GCCCTATCAGTGAAACTGATCTTTCAGTCCAAAAGCTGAAATACCCACACAAGACGAGAA  
GACCCTGTGGAGCTTAAAACCCCA-TACTAAT--AA-ACTAGTATGCCTTTAAGTTGGG  
GCGACTTCGGAACAAAACAAAACCTCCGAGCACAGA-ACC-ACC-AC-TTCT-TC-  
CTAAGGCCACACGCC-AAA--GAATTGACCCAGT-CACACT--GATCAACGAACC  
AAGTTACCCCAGGGATAACAGCGCTATCTTCTTCAAGAGTCCATATCGACAAGAAGTTT  
ACGACCTCGATGTTGGATCAGGACACCCAAATGGTGCAGCCGCTATTAAAGGTTGTTT  
TTCAACGATTAACAGTCCTACGTGATCTG

>NAP-6376\_Scincella\_rupicola

---GCCCA

GTGAAC--TTTTTTAACGGCCGCGG-TATTCTAACCGTGCAAAGGTAGCGTAATCA  
CTTGTCTTCTAAATAAAGACCTGTATGAA-CGGCTAAATGAGGGCGGGCCTGTCTCCTGC  
GCCCTATCAGTGAAACTGATCCCCCAGTCCAAAAGCTGGAATCTCCTCACAAGACGAGAA  
GACCCTGTGGAGCTTTAAACCTAA-TACTAAT--GA-ACTAGTACCTGTTTTGAGTTGGG  
GCGACTTCGGAACAAAATAAAACCTCCGAGCACAGA-ACC-ACT-AC-TTCT-TAG  
CCGAGGCCAACAAAGCC-AAA--GAACTGACCCAGT-CACACT--GATCAACGAACC  
AAGTTACCCCAGGGATAACAGCGCCATCTTCTCAAGAGTTCATATCGACAAGAAGGTTT  
ACGACCTCGATGTTGGATCAGGACACCCAAATGGTGCAGCCGCTATTAAGGTTCTGTTG  
TTCAACGATTAACAGTCCTACGTGATCTG

>BAM-36\_Ablepharus\_deserti

AAACCCATCCCATTATCAAAATTGTAACAGCTCATTTCATCGACCTGCCATCCCCCTCTA  
ACATTTCTGCCTGATGAACTTCGGCTCACTACTAGGCTTATGCTTGATTTCCCAAACCTT  
TAACAGGCCTATTTTTAGCCATGCATTATACTGCAGACATCACCTCGGCCTTCTCCTCCA  
TCGCCCACATCTGCCGAGACGTACAATACGGTTGACTTATCCGAAATCTTCATGCAAACG  
GTGCCTCCATATTCTTTATTTGCCTCTACCTTCACATCGGCCGAGGTCTTTATTATGGCT  
CTTACATATATAAAGAGACCTGAAACATCGGCGTAGTATTACTACTAGTAATAGCAA  
CTGCCTTCGTGCGCTATGTTCTTCCATGAGGACAAATATCATTCTG

>BAM-1111\_Ablepharus\_kitaebelii

AAACTCACCCAATTATTAATAAATTGTAACAGCTCATTTCATTGACTTACCATCCCCATCAA  
ACATTTCTGCTTGATGAACTTCGGCTCTCTACTCGGACTATGCCTAATTACCCAAACCC  
TCACAGGCTTATTCTTGGCCATACATTATACAGCCGATATCTCCTCCGCCTTCTCATCTA  
TCGCCCATATCTGCCGAGATGTACAATATGGCTGACTTATCCGAAACCTACATGCAAACG  
GGCCTCCATATTTTTTATCTGCCTCTACCTTCATATCGGCCGAGGACTTTACTATGGTT  
CATACATATATAAAGAGACCTGAAACATTGGTGTAACTCCTACTTCTATTAGTTATGGCAA  
CAGCCTTCGTGCGCTATGTTCTACCATGAGGACAAATATCATTCTG

>R-14554\_Ablepharus\_pannonicus

AGACCCACCCAATCATTAAAATCGTAAATAACTCATTTCATCGACCTTCCATCCCCGTC  
ATATTTCTGCTTGATGAACTTTGGCTCCCTGCTTGGCCTTTGCCTTATTATACAAACCC  
TCACAGGCTTATTTTAGCCATACACTACACAGCAGACATCTCATCCGCTTCTCCTCCA  
TCGCCCATATTTGCCGTGATGTTCAATACGGGTGACTTATCCGAAATCTCCATGCAAATG  
GCGCATCTATATTTTTTATTTGCCTGTACCTCCACATTGGCCGGGGGCTCTACTACGGCT  
CATATATATATAAAGAAACATGGAACATCGGCATAATCCTATTACTCCTGGTAATAGCAA  
CGGCTTTCGTGCGCTATGTTCTACCTGAGGACAAATATCATTCTG

>BAM-15\_Asymblepharus\_eremchenkoi

AAACCCATCCAATCATTAAAATTGTAACAGCTCATTTCATTGACCTACCATCCCCATCAA  
ATATTTCTGCTTGATGAACTTTGGCTCACTATTAGGCCTATGTCTAATTATACAAACTA  
TTACAGGCTTATTTCTAGCCATGCACTATACAGCAGACATTTCTCCGCTTTTCTCCTCCA  
TCGCCCACATCTGCCGAGATGTTCAATACGGATGACTTATACGAAACCTCCACGCAAACG  
GCGCATCCATGTTCTTTATCTGCTTATATCTTCACCTGGGCCGCGGGCTCTATTATGGCT  
CATATATATACAAAGAGACCTGAAACATTGGTGTAACTCCTACTTCTACTAGTTATAGCAA  
CAGCTTTCGTGCGTTATGTTCTACCTGAGGACAAATATCATTCTG

>BAM-135\_Asymblepharus\_alaicus

AAACCCACCCCATCATTAAAATTGTAACAATTTCATTTCATTGACCTACCATCCCCATCAA  
ATATTTCTGCTTGATGAACTTTGGCTCCCTACTAGGCTTATGCCTAATTATACAAACCA  
TTACAGGCTTATTTCTAGCCATACACTATACAGCAGACATTTCTCCGCTTTTCTCCTCCA  
TCGCCCACATCTGCCGAGATGTTCAATATGGATGACTTATACGAAACCTCCACGCAAACG  
GCGCATCAATATTCTTTATCTGTTTATATCTTCACCTCGGCCGCGGGCTCTATTATGGCT

CTTATATATATAAAGAAACCTGAAACATTGGCGTAGTCCTGCTTCTATTAGTTATAGCAA  
CAGCATTGTGGCTATGTCCTACCTTGAGGACAAATATCATTCTG

>NAP-9807\_Asymblepharus\_mahabharatus

AAACCCACCCAATCTTAAAAATTGTAAACGACTCATTTATTGACCTACCATCCCCATCAA  
ACATTTCTGCCTGATGAAACTTTGGCTCCCTTCTGGGCCTCTGCTTAATTGCACAAACCC  
TAACCGCCTATTTTTAGCCATACACTATACAGCAGACATCTCGTCAGCCTTTGCCTCAA  
TCACCCATATTTGCCGCGATGTACAATACGGTTGACTTATTGAAACCTACACGCAAATG  
GGGCCTCTATATTCTTCATTTGTTTATACCTTCACATTGGCCGAGGACTTTACTATGGCT  
CCTACATATACAAAGAAACCTGAAACATTGGCGTACTTTTACTTTTACTCGTCATAGCAA  
CAGCCTTTGTAGTTACGTATTACCTTGAGGACAAATATCATTCTG

>NAP-9870\_Asymblepharus\_nepalensis

AAACCCACCTGTATTAATAAATTGTAAATAACTCATTGACCTACCGTCCCCATCAA  
ATATTTCTGCTTGATGAAACTTTGGCTCACTACTTGGCCTATGCCTTATTGCTCAAACCA  
TCACAGGCCTTCTTAGCCATACACTACACGGCTGACGTCTCATCCGCCTTCTCCTCCA  
TCGCCCACATCTGTCGCGATGTACAATACGGTTGACTTATTGAAACCTCCATGCAAACG  
GCGCCTCTATATTTTTTATTTGCCTTTACCTTCACATCGGCCGAGGACTTACTACGGCT  
CCTACACATATAAAGAAACCTGAAATATTGGCGTCATCCTTTTACTACTCGTTATAGCAA  
CAGCCTTTGTGGCTATGTAATGCCATGAGGACAAATATCATTCTG

>NAP-9840\_Asymblepharus\_sikkimensis\_2

AAACCCACCCCTCATCAAAATTGTAAATGATTCGTTTCATCGACCTGCCATCCCCATCAA  
ATATTTCCGCCTGATGAAACTTTGGCTCACTCCTAGGCCTCTGCTTAATTGCACAAACCC  
TTACCGGTTTATTCCTAGCTATGCACTATACAGCAGATATCTCCTCCGCCTTCTCATCAA  
TCGCCCATATCTCCCGAGATGTACAATACGGCTGACTTATCCGGAATCTTCAGCCAACG  
GCGCCTCTATATTCTTCATTTGCCTGTACCTTCACATCGGCCGAGGACTTTATTACGGCT  
CATATATATATAAAGAGACCTGAAACATCGGTGTAATTCTTCTCCTACTAGTAATAGCAA  
CAGCCTTTGTAGGATATGTCCTACCATGAGGACAAATATCATTCTG

>NAP-9816\_Asymblepharus\_sikkimensis\_3

AAACCCACCCCTCATCAAAATTGTAAACGACTCGTTTCATCGACCTGCCATCTCCATCAA  
ATATTTCCGCCTGATGAAACTTTGGTTCACTCCTAGGCCTCTGCTTAATTGCACAAACCC  
TTACCGGTTTATTCCTAGCTATACACTATACAGCAGACATCTCCTCAGCCTTCTCATCAA  
TCGCCCATATTTCTCGAGATGTTCAATACGGCTGACTCATCCGAAATCTTCATGCCAACG  
GCGCCTCTATATTCTTCATTTGCCTATACCTTCACATTGGCCGAGGACTTTATTATGGCT  
CATACATGTATAAAGAAACCTGAAACATCGGTGTAATTCTTCTCCTACTAGTTATAGCAA  
CAGCCTTTGTAGGATATGTCCTACCATGAGGACAAATATCATTCTG

>NAP-9858\_Asymblepharus\_sikkimensis\_1

AAACCCACCCCTCATCAAAATTGTAAATGATTCATTTCATCGACCTGCCATCCCCATCAA  
ATATTTCCGCCTGATGAAACTTTGGCTCACTCCTAGGCCTCTGCTTAATTGCACAAACCC  
TTACCGGTTTATTCCTAGCTATGCAATTACAGCAGACATCTCCTCCGCCTTCTCATCAA  
TCGCCCATATCTCCCGAGATGTACAATACGGCTGATTAATCCGGAATCTTCAGCCAACG  
GCGCCTCTATATTCTTCATTTGCCTGTACCTTCACATCGGCCGAGGACTTTATTATGGCT  
CATATATATACAAAGAGACCTGAAACATCGGTGTAATTCTTCTTCTATTAGTAATAGCAA  
CAGCCTTTGTAGGATATGTCCTACCATGAGGACAAATATCATTCTG

>ZM146\_Protoblepharus\_sp.nov.

-CCATCCA

ACATCTCAGCATGATGAAACTTCGGGTCCTACTAGGCCTTTGTCTAATTATACAAACTC  
TAACAGGCCTATTCTTAGCAATACACTACACAGCAGATATTACATCAGCCTTCTCTTCAA  
TCGCCCACATCTGTCGAGACGTCCAATACGGCTGACTCATCCGAAACCTTCAGCAAACG  
GCGCTTCACTCTTCTTCATTTGCCTTTACCTACATGTAGGACGTGGACTATATTACGGCT



CTTACACATACAAAGAAACCTGAAACATTGGAGTAATCCTCCTCTACTAGTAATAGCCA  
CAGCCTTCGTAGGCTATGTTCTACCATGAGGACAAATATCATTCTG

>ZM145\_Protolepharus\_sp.nov.  
-CCATCCA

ACATCTCAGCATGATGAAACTTCGGGTCCCTACTAGGCCTTTGTCTAATTATACAAACTC  
TAACAGGCCTATTCTTAGCAATACACTACACAGCAGATATTACATCAGCCTTCTCTTCAA  
TCGCCCACATCTGTGAGACGTCCAATACGGCTGACTCATCCGAAACCTTCACGCAAACG  
GCGTTCCTCTTTCTTTATTTGCCTTTACCTACATGTAGGACGTGGACTATATTACGGCT  
CTTACACATACAAAGAAACCTGAAACATTGGAGTAGTCCTCCTCTACTAGTAATAGCCA  
CAGCCTTCGTAGGCTATGTTCTACCATGAGGACAAATATCATTCTG

>NAP-6640\_Scincella\_melanosticta

AAACCCACCTGTTCTAAAAATCGTAAACAACCTCATTGACCTCCCCTCCCCTTCCA  
ACATCTCAGCCTGATGAAACTTCGGATCTCTCCTCGGAGTCTGCCTAATTATACAAGTAT  
TAACAGGACTATTCTAGCCATACACTACACAGCAGACATCTCCTCAGCCTTCTCATCGA  
TCGCCCACATCTGCCGTGACGTCCAATATGGTTGACTAATCCGAAACCTACATGCTAACG  
GGGCTCTATATTCTTTATTTGCATCTACCTCCACATCGGACGCGGGCTTTATTACGGCT  
CATACATATATAAAGAAACCTGAAATATCGGAGTAGTGCTTCTACTTCTTGT AATAGCAA  
CCGCTTCGTAGGCTATGTCCTCCATGAGGACAAATATCATTCTG

>NAP-1331\_Scincella\_doriae

AAACACACCCAATCCTAAAAATTGTCAATGATTCTTCATTGACCTCCCCTCACCTCAA  
ACATTTCAGCCTGATGAAATTTGGCTCCCTTTTAGGGCTCTGCCTAATTATTCAAGTTC  
TTACAGGGCTCTTCTTAGCCATACACTACACCGCTGATATCTCCTCCGCCTTCTCTCAA  
TCGCCCACATCTGCCGCGATGTTCAATACGGCTGACTAATTCGAAACCTCCATGCTAACG  
GCGCTCAATATTCTTTATTTGCCTATATCTTCATATTGGACGCGGCCTATATTACGGCT  
CCTACATATATAAAGAAACATGAAACATTGGCGTTATTCTCCTACTATTGGTAATAGCAA  
CTGCCTTCGTGCGTTATGTCCTCCCATGAGGACAAATATCATTCTG

>NAP-6376\_Scincella\_rupicola

AAACCCACCCCTCCTAAAAATTATTAATAATTCTTTTATTGACCTCCCCTCACCTCAA  
ACATCTCCGCCTGATGAAACTTCGGATCGCTTTTAGGACTTTGCCTAATTGTGCAGGTCC  
TCACCGGACTATTCTTAGCCATACACTATACTGCTGATATCTCCTCAGCCTTCTCTTCAA  
TTGCTCATATCTGCCGAGATGTCCAATACGGGTGGTTATGCGAAACCTCCATGCAAACG  
GCGCTCCATATTCTTTATTTGCATTTACATTCATGTTGGACGGGGCTTATACTACGGCT  
CTTATATGTACAAAGAGACATGAAACATCGGAGTAATCCTCCTTACTAGTAATAGCAA  
CAGCCTTCGTAGGATATGTTCTCCCCTGAGGACAAATATCATTCTG

>BAM-15\_Asymblepharus\_eremchenkoi

CAAGAACCAGAACCTGCACTCCCCGATGTACTACTTCATCTGCTGCCTGGCTGTCTCGGA  
CACGCTGGTGAGCGTCAGCAACCTGGTGGAGACCCTTTCATGCTGCTGATCGAGCACGG  
CGTCTGGTGGCCGAGTACAACACCCTGAAGCATGGACAACGTCATGGACATGCTGAT  
CTGCAGCT--CACTGCTGTCCCTCCTCCTTCTGGGGTCAATTGCCGTGACCG  
CTACATCACCATCTTCTATGCCCTGCGCTACCACAGCATCATGACCCTCCAGCGGGCGGT  
GCTCATATTGTGGTGGTCTGGCTGGCCAGCAGCATCTCCAGCACCATCTTCATCGCCTA  
TGACAGCGACGCGTCTCCTGTGCGTGGTATCTTCTCCTCCTCATGGTCACCCTCAT  
TGTGGCGCTCTACATCCACATGTTACCCTGGCCACCAGCACGCCCGGCGGATCTCCAG  
CCAGCAGAGGAAGCAGACCGCCCCCACTTACCAGCATGAAAGGGGCCGTACCCTCAC  
CATCTTGCTGGGGTCTTCTTCTGCTGCTGGGGGCCCTTCTCCTGCACCTGATCCTCAT  
CCTCACCTGCCCCAGGCACCGGCCTGCAGCTGCTACTTCAGCTACTTCAACCTTACCT  
CATTCTCGTCATTTGCAACTCTGTGGTGGACCCCATCATTTTCTTT

>BAM-135\_Asymblepharus\_alaicus

CAAGAACCGGAACCTGCACTCCCCAATGTACTACTTCATCTGTTGCCTGGCTGTCTCGGA  
CACGCTGGTGAGCGTCAGCAACCTGGTGGAGACCCTTTCATGCTGCTGATCGAGCACGG  
CGTCCTGGTGGCCGAGTACAACACCCTGAAGCATGGACAACGTCATGGACATGCTGAT  
CTGCAGCT--CCCTGCTGTCCCTCCTCCTTCTGGGGGTCATTGCCGTCGACCG  
CTACATCACCATCTTCTATGCCCTGCGCTATCACAGCATCATGACCCTCCAGCGGGCGGT  
GCTCATCATTGTGGTGGTCTGGCTGGCCAGCAGCATCTCCAGCACCATTTTCATCGCCTA  
CGACAGCGACGCGGTATCCTGTGCGTGGT GATCTTCTTCTCTCCACGGTACCCTCAT  
TGTGGCGCTCTACATCCACATGTTACCCTGGCCCACCAGCACGCCCGGCGGATCTCCAG  
CCAGCAGAGGAAGCAGACCGCCCCCACTTACCAGCATGAAAGGGGCCGTCACCCTCAC  
CATCTTGCTGGGGGTCTTCTTCGTCTGCTGGGGGCCCTTCTTCTGCACCTGATCCTCAT  
CCTCACCTGCCCCAGGCACCCGGCCTGCAGCTGCTACTTCAGCTACTTCAACCTTACCT  
CATTCTCGTCATTTGCAACTCTGTGGTGGACCCCATCATTTACCCTT

>BAM-36\_Ablepharus\_deserti

CAAGAACCGGAACCTGCACTCCCCGATGTACTACTTCATCTGCTGCCTGGCTGTCTCGGA  
CACGCTGGTGAGCGTCAGCAATCTGGTGGAGACCCTTTCATGCTGCTGATCGAGCACGG  
CGTCCTGGTGGCCGAGTACAACACCCTGAAGCATGGACAACGTCATGGACATGCTGAT  
CTGCAGCT--CCCTGCTGTATCCCTCCTTCTGGGGGTCATTGCCGTCGACCG  
CTACATCACCATCTTCTATGCCCTGCGCTACCACAGCATCATGACCCTCCAGCGGGCGGT  
GCTCATCATTGTGATGGTCTGGCTGGCCAGCAGCATCTCCAGCACCATTTTCATCGCCTA  
CGACAGCGACGCGGTATCCTGTGCGTGGT GATCTTCTTCTCTCCATGGTACCCTGAT  
TGTGGCGCTCTACATCCACATGTTACCCTGGCCCACCAACAGGCCCGGCGGATCTCCAG  
CCAGCAGAGGAAGCAGACCGCCCCCACTTACCAGCATGAAAGGGGCCGTCACCCTCAC  
CATCTTGCTGGGGGTCTTCTTCGTCTGCTGGGGGCCCTTCTTCTGCACCTGATCCTCAT  
CCTCACCTGCCCCAGGCACCCGGCCTGCAGCTGCTACTTCAGCTACTTCAACCTTACCT  
CATTCTCGTCATTTGCAACTCTGTGGTGGACCCCATCATTTACGCTT

>NAP-9870\_Asymblepharus\_nepalensis

CAAGAACCGGAACCTGCACTCCCCAATGTACTACTTCATCTGCTGCCTGGCTGTCTCAGA  
CACGCTGGTGAGCGTCAGCAACCTGGTGGAGACCCTTTCATGCTGCTGATCGAGCATGG  
CGTCCTGGTGGCCGAGTACAACACCCTGAAGCATGGACAACGTCATGGACATGCTGAT  
TTGCAGCT--CCCTGCTGTGTCCTCCTTCTGGGGGTCATTGCCGTTGACCG  
CTATATCACCATCTTCTATGCCCTGCGCTACCACAGCATCATGACCCTCCAGCGGGCGGT  
GCTCATCATCGTGATGGTCTGGCTGGCCAGCAGCATCTCCAGCACCATTTTCATCGCCTA  
CGACAGCGACGCGGTATCCTGTGCGTGGT GATCTTCTTCTCTCCATGGTACCCTCAT  
CGTGGCACTCTACATCCACATGTTACCCTGGCCCACCAGCATGCCCGGCGGATCTCCAG  
CCAGCAGAGGAAGCAGACCGCCCCCACTTACCAGCATGAAAGGGGCCGTCACCCTCAC  
CATCTTGCTGGGGGTCTTCTTCGTCTGCTGGGGGCCCTTCTTCTGCACCTGATCCTCAT  
CCTCACCTGCCCCAGGCACCCGGCCTGCAGCTGCTACTTCAGCTACTTCAACCTTACCT  
CATTCTTGTCATTTGTA ACTCTGTGGTGGACCCCATCATTTACGCTT

>NAP-9807\_Asymblepharus\_mahabharatus

CAAGAACCGGAACCTGCACTCCCCAATGTACTACTTCATCTGCTGCCTGGCTGTCTCAGA  
CACGCTGGTGAGTGTGAGCAACCTGGTGGAGACCCTTTCATGCTGCTGATCGAGCACGG  
CGTCCTGGTGGCCGAGTACAACACCCTGAAGCATGGACAACGTCATGGACATGCTGAT  
CTGCAGCT--CCCTGCTCTCGTCCCTCCTTCTGGGGGTCATTGCCGTCGACCG  
CTACATCACCATCTTCTACGCCCTGCGCTACCACAGCATCATGACCCTCCAGCGGGCGGT  
GCTCATCATTGTGGTGGTCTGGCTGGCCAGCAGCATCTCCAGCACCATTTTCATCGCCTA  
CGATAGTGACGCGGTATCCTGTGCGTGGT GATCTTCTTCTCTCCATGGTACCCTCAT  
CGTGGCGCTCTACATCCACATGTTACCCTGGCCCACCAGCACGCCCGGCGGATCTCCAG  
CCAGCAGAGGAAGCAGACCGCCCCCACTTACCAGCATGAAAGGGGCCGTCACCCTCAC  
TATCTTGCTGGGGGTCTTCTTCGTCTGCTGGGGGCCCTTCTTCTGCACCTCATCCTCAT  
CCTCACCTGCCCCGGCACCCGGCCTGCAGCTGCTACTTCAGCTACTTCAACCTTACCT  
CATCCTTGTCATTTGCAACTCTGTGGTGGACCCCATCATTTCCCTT

>NC054206\_Scincella\_reevesii  
---CTGCTGTGTGGCCGGGTCGTA

TTCGGAGGTGAGCGTGAGCGTCATGGCCTAGACGGTCTTCATGTTGCTGATGCTGATCGG  
GCTGCTGGTGGTGGTGGCCGACTACCTCACGCTGAAGCACATGGTCAAGGACATGCACAT  
GCGCATCT--CCCTGATGTGACCCCCCTCTCCCGGGCGTGGTCGTCATCGACCG  
CTACATCAACATCTTCTACTTCCAGGCCTAGCACAAACATGACCCTGACCCTGGCGGT  
GGTCATGATGATCATGGTCTGGGTGGGGATGGCCATCACCATCACCCTCTTCATCTTCAA  
CGACAACGACACCGACATCCTGTGCCTGGTCATGTTATCCTCTTCATGGGCACGGTCAT  
CCTGGTCTGGACCTGCACATGTTGTTGGCCAGCAGCACCCCCACCGGATCTCGAT  
CCTGCACCTGAAGCCGAACCCACCCCTTCCACTTCTGAACGGGACCGTCGCCCTCAC  
CCTGCTGCTGGGGGTGGTGGTCTTCTGCTGGGGCGGGTGTCTTCTCCTCAACCTCAT  
CCTCATCTGCACCAGGCACACGCACTGCACCTGCTACTTCAACTACTTCTACTTCAACCT  
CAACCTGATCATGGTCAACTGCAAGGTGGAGCTGAACACTAACATCT

>NHMC80.3.131.57\_Ablepharus\_anatolicus

CTCTACTAATGAACCCTATTTTAAATTCTTTGATTATCTCAAACCTCGCCCTAGGNACAAACAT  
TACACTATCTAGCTACCATTGATTATTCGCCTGGCTAGGCCTAGAACTTAATACATTAGC  
GATTATTCCAATTATTGCACAACAACATCATCCCCGAGCAACCGAAGCAGCAACAAAATA  
TTTCCTCATTCAAGCAGCCGCTCAGCAATACTACTATTTGCCAGTACCCTAAACGCCTG  
ATCAACAGGCACCTGAAATATTACAGAACTCTCAAATCAATCCGCCTCCATTATATTAAC  
CATGGCCCTCGCAATAAACTAGGACTTGCCCCATTACACTTCTGATTACCAGAAGTCCT  
ACAAGTTCTACTACAATAACCGCACTAATTATCGCCACATGACAAAACTAGCTCCCCT  
TGCTCTATTATATCTTACATAAACACATTACACCCCAACTTTACTAATCATAGCTTT  
AATGTCCACCCTTGTGGGCGGTTGAGGCGGTCTAAACCAACCCAACTA---

>BAM-36\_Ablepharus\_deserti

CTCTACTAATGAATCCAGTAATAACCTCATTAAATTATCTCAAGCCTAGCCCTAGGCACGATCAT  
CACAATGTCTAGCCACCATTGACTACTCGCCTGACTGGGCCTAGAACTTAATACCCTAGC  
AATTATTCCAATCATCGCACACCAACATCACCCACGAGCAACTGAAGCCGCAACAAAATA  
TTTCCTGACCCAAGCAGCTGCATCAGCCATACTCTTATTTGCCAGCACCACAAACGCCTG  
ATCCACTGGCACCTGAAATATTCTAGAACTATCAAACCTACCCGCCACCATTATACTAAC  
AACAGCCCTAGCAATAAACTAGGCCTAGCCCCACTACACTTCTGATTACCTGAAGTCCT  
ACAGGGCTCAACTATCAAGACCGCACTAATTCTTACCACCTGACAAAAGTTAGCCCCAAT  
GACCATCCTTTACCTAACATAACAATTCACTTCATCCTATAACACTACTAATCATAGCCCT  
TATATCAAGCCTTATTGGTGGCTGAGGTGGCCTAAACCAACCCAACTA---

>BAM-1111\_Ablepharus\_kitaebelii

CTCTTTAATGAACCCTGTTATAAATTCCTTAATCATTTCAAGCCTTGCCCTAGNACTATAAT  
TACACTGTCCAGCCACCCTGATTACTTGCTTGACTTGGCCTTGAACCTAAATACCCTAGC  
AATTATCCCAATTATCGCACATCAACATCACCCCGCGCAACCGAAGCTGCAACAAAGTA  
CTTTCTTATTCAAGCAGCTGCCTCAGCCATACTACTATTTGCCAGCACCACAAATGCCTG  
ATCCACAGGCACCTGAAACATTATAGAACTCTCAAACCAACCCGCTTCCATTATATTAAC  
CATAGCTCTAACAATAAAATTAGGACTTGCCCCATTACACTTCTGACTACCAGAAATTCT  
ACAGGGCTCCACTACCAAACTGCATTGATTATCGCCACATGACAAAATTAGCCCCAT  
AACCTACTATACCTTACATACAACTCACTACACTCAACAACACTACTAATTATAGCCCT  
AATATCAACCCTTGTGGGCGGCTGAGGTGGCCTCAACCAACCCAACTA---

>NHMC80.3.82.2\_Ablepharus\_kitai belii

CTCTACTAATGAACCTCCTTATAAACTCCTTAATCATTTCAAGCCTTGCCCTTGGNACAAAAAT  
TACACTGTCCAGCCACCCTGATTACTTGCTTGACTTGGCCTAGAATTAATACCCTAGC  
AATTATCCAGTTATCGCACACCAACATCACCCCGCGCAACCGAAGCAGCAACAAAGTA

CTTTCTCATCCAAGCAGCTGCCTCAGCCATGTTACTATTTGCCAGCACCACAAATGCCTG  
ATCCACGGGCACCTGAAATATTATAGAACTCTCAAACCAATCCGCTTCCATTATATT AAC  
CATGGCTCTGACAATAAAATTAGGACTTGCCCCATTACACTTCTGATTACCAGAAAATTT  
ACAAGGCTCCACCACCAAAACTGCATTAATTATCGCTACATGACAAAAATTAGCCTCTCT  
AACCTACTATACCTTACATATAATTCATTACACCCAACAACACTTCTAATTATAGCCTT  
AATATCAACCCTTGTCGGCGGCTGAGGTGGCCTCAACCAAACCCAACCTA---

>R-14554\_Ablepharus\_pannonicus

CTCTACTAATGAACCCAATTATAAECTTCACTAATTATCTCAAGCCTCGCCTTAGGTACTATTAT  
TACACTAAGTATCACTGATTATTAGCCTGACTTGGCCTAGAACTTAATACCCTAGC  
AATTATTCCGATTATTACACAACAACACCACCCACGAGCAACAGAAGCAGCAACAAAATA  
CTTCTAAGCTCAAGCTGCAGCCTCAGCTATACTAATATTTGCTAGCACCACGAACGCCTG  
AACTACTGGCAGCTGAAACATTCTAGAACTCTCCAGCCAACCAGCCTCTATTATATTAAC  
CATAGCCTTAGCAATAAAACTAGGACTCGCCCCACTTCACTTCTGATTGCCTGAAGTCCT  
ACAAGGTTCCACCATCAAAACAGCATTAAATTATTACAACATGACAAAAACTCGCCCCACT  
AGCTCTTTTACCTAACACACAACATGCTACACCCCAACATATTATTAATTATAGCCCT  
AATATCAAACCTCATTGGCGGTTGAGGCGGATTAACCAAACCCAACCTA---

>NHMC80.3.169.5\_Ablepharus\_rueppellii

CTCTACTAATGAATCCCAGTTTTAACTCCTTACTTATCTCAAACCTCGCCTCGGTACTATTAT  
TACTCTATCTAGCCACCACTGACTACTCGCCTGACTAGGATTAGAACTAAACACCCTAGC  
AATTATCCCCATTATTGCACACCAACATCACCCACGCGCAACCGAAGCGGCAACAAAATA  
TTTCCTCACTCAGGCAGCCGCTTCGGCTATACTTCTATTTGCCAGCACCATTAATGCATG  
GTCTATGGGTACATGAAACATCTTAGAGCTCTCAAGTCAACCCGCTTCCATTATATTAAC  
AATAGCCCTGGCAATAAAACTAGGACTTGCCCCCTTACACTTCTGATTGCCGGAGGTCTT  
ACAAGGCTCTACAACCATAACAGCACTAATTATCACCACTTGACAAAAACTAGCCCCCT  
CGCCCTTCTACTCTTACATATAACACACTGCACCCCCAACACTACTAATGATGGCCCT  
AATATCAACACTTGTCGGCGGCTGAGGGGGCCTCAACCAAACCCAACCTA---

>BAM-15\_Asymblepharus\_eremchenkoi

CTCTACTAATGAATCCAATTATAGCCTCACTAATTATATCAAGCCTAGCCATAGGCACAATCAT  
CACACTATCTAGCTACCACTGATTATTAGCCTGACTGGCCTAGAACTTAATGCTTTAGC  
AATTATTCCCATTATTGCTAAACAACACCACCCCGCGCAACAGAAGCAGCAACAAAATA  
TTTCCTTACTCAGGCAGCCGCATCAGCATTACTCCTATTGCAAGTATTATTAATGCTTG  
AGCCACCGGAACCTGGAACATTATTGAATTTCTGACCCGCAAGCCTCTATCATACTAAC  
TACCGCCCTAGCATTAAAATTAGGCCTTGCCCCACTACACTTCTGATTACCAGAGGTTTT  
ACAAGGCATCACTATAAAAACTGCACTAATTATTACCACATGACAAAAACTAGCCCCACT  
AACCTTTTTTTACTTAACATATAAECTCACTACACCCCAACACTACTGATTATAGCCCT  
TCTATCAAACCTTCTCGGCGGTTGAGGCGGCTTAAACCAAACCCAACAA---

>BAM-135\_Asymblepharus\_alaicus

CTCTACTAATGAATCCNATTATAAECTTCACTAATTATCTCAAGCCTAGCCATAGGTACAATCAT  
CACACTATCGAGCTACCACTGATTATTGGCCTGAATGGCCTAGAACTAAATGCCTTAGC  
AGTTATTCCCATTATTGCCAAACACCACCACCCCGCGCAACAGAAGCAGCAACAAAATA  
CTTCTTACCCAAGCAGCCGCATCAGCATTACTCCTATTGCAAGTATTATCAATGCTTG  
ATCCACCGGAACCTGAAGTATTATTGAACTTTCTAACCACAAGCCTCTATTATATTAAC  
GACTGCCCTCGCATTAAAATCAGGCCTTGCCCCACTACACTTCTGATTGCCAGAAGTTTT  
ACAAGGCACCACCATACAAACTGCACTAATTATTGCCACATGACAAAAACTAGCCCCACT  
AACCTTTTTTTATTTAACATATGACTCACTACACCCCAACGCTACTGATTATAGCCCT  
ACTATCAAACCTTCTCGGCGGTTGAGGCGGCTTAAACCAAACCCAACCTA---

>NAP-9807\_Asymblepharus\_mahabharatus

CTTTACTAATGAACCCCTTTAATAACCTCTTTAATTATCTCAAGTTTAGCCCTAGGCACAATCAT  
TACACTATCTAGCCACCATTGATTGTTAGCCTGACTAGGCTTAGAACTTAATACACTCGC  
AATTATTCCCCTAATCGCAGAACAACATCATCCACGTGCAACCGAAGCAGCTACAAAGTA  
TTTCCTTACACAAGCAGCCGCATCAGCACTACTTCTATTTGCCAGCACCACAAACGCCTG  
ACTTACAGGCACCTGAAATATTATCGAATTATCAAGTCAACCAGCATCCATTATATTAAC  
TATAGCACTGGCAATAAAAATTAGGCCTTGCCCACTCCACTTCTGATTACCAAGAGGTATT  
ACAAGGCACCACCATGAAAACAGCACTAATCATTACCACATGACAAAACTAGCCCCATT  
AGCCCTATTATACTTAACATAACAATACTTTACACCCTATAAACTATTAACAATAGCCCT  
TCTATCAAACATCCTCGGTGGGTGAGGCGGCCTGAACCAACCCAACAA-

>NAP-9870\_Asymblepharus\_nepalensis

CTTTACTAATGAACCCATAATAATAACCTTATTATTTCTAGCCTTGCAACAGGCACAATCAT  
CACACTATCAAGCTACCATTGATTACTCGCCTGAATCGGACTAGAACTTAATGCTCTATC  
AATCATTCCAATCATCGCAAAACACCACCACCCCGCGCAACCGAAGCAGCAACAAAATA  
CTTCCTCACACAAGCAGCTGCATCAGCACTATTATTATTTCAAGCACTACAAATGCTTG  
AATTACAGGCACCTGAAATATTACTGATATCTCAAATCAACCAGCCTCAATTATACTAAC  
AATAGCCCTTGCAATAAAAATTAGGACTTGCTCCCATACACTTCTGACTCCCAGAAGTACT  
ACAAGGCACCACCTAAAACAGCATTAAATTATTACCACATGACAAAAATTGGCCCCATT  
AGCCCTCTTCTACTTAACACATAATGCACTACACCAACAACACTACTAACTATAGCCAT  
CCTATCAAACATCATCGGCGGTGAGGTGGCCTCAACCAACCCAACAA

>NAP-9840\_Asymblepharus\_sikkimensis\_2

CTTTACTAATGAACCCATAATAACCTCTTTAATTATCTCCAGCCTTGCCCTAGGTACAATTAT  
TACACTATCTAGTTACCATTGATTATTAGCCTGAGTTGGCCTAGAACTCAATACCCTAGC  
AATTATTCCCATTATTGCACAACAACATCACCCACGCGCAACCGAAGCAGCAACTAAATA  
TTTCCTCACCCAAGCAGCCGCATCAGCACTAGTACTATTTGCAAGTACTACAAATGCCTG  
ATTTACTGGCACCTGAAATATCACTGAACTATCGAACCAGCCGGCCTCCATCATATTAAC  
TATAGCCTTAGCAATAAAACTAGGACTTGCCCACTACACTTCTGACTCCCAGAGGTATT  
ACAAGGCACACTATAAAAACAGCACTGATTATTACCACATGACAAAACTGGCCCCAT  
CACCCCTCCTTTACCTTACACATAATCACTCCACCAACAACGCTTCTACTCTTGCCCT  
AACATCAAACATTATCGGCGGTTGAGGGGGACTAAACCAACCCAACTA

>NAP-9816\_Asymblepharus\_sikkimensis\_3

CTTT  
ACTAATGAATCCTATAATAGCCTCTTTAATCATCTCCAGCCTTGCCCTAGGCACAATCAT  
CACACTATCTAGTTACCATTGATTATTAGCCTGAGTTGGCTTAGAACTAAATACCCTAGC  
AATTATTCCCTATTATTGCACAACAACATCACCCCGCGCAACCGAAGCAGCAACTAAATA  
TTTCCTCACCCAAGCAGCTGCATCAGCACTAGTATTATTTGCAAGTACTACAAATGCTTG  
ATTTACTGGCACCTGAAATATCACTGCACTATCAAACCAACCAGCCTCCATCATATTAAC  
TATAGCATTAGCAATAAAACTAGGACTTGCCCACTACACTTCTGACTCCCAGAGGTATT  
ACAGGGCACTACTATAAAAACAGCACTAATTATTATCACATGACAAAACTGGCCCCCT  
CACACTCCTTTACCTTACATATAATCACTGCACCCTTAACGCTGCTACTCATAGCCCT  
AACATCAAACATTATCGGTGGTTGAGGGGGCCTAAACCAACCCAACTA-

>NAP-9858\_Asymblepharus\_sikkimensis\_1

CTTTACTAATGAATCCTATAATAACCTCTTTAATTATCTCCAGCCTTGCCCTAGGTACAATTAT  
TACACTATCTAGTTACCATTGATTATTAGCCTGAGTTGGCTTAGAACTCAATACCCTAGC  
AATTATTCCCATTATTGCACAGCAACATCACCCACGCGCAACCGAAGCAGCAACTAAATA  
TTTCCTCACCCAAGCAGCCGCATCAGCACTAGTACTATTTGCAAGTACTACAAATGCCTG  
ATTTACTGGCACCTGAAATATCACTGAACTATCAAACCAACCAGCCTCCATCATACTAAC  
TATAGCATTAGCAATAAAACTAGGACTTGCCCACTACACTTCTGACTCCCAGAGGTATT  
ACAAGGCACACTACTATAAAAACAGCACTGATTATTACCACATGACAAAACTGGCACCCCT  
CAGCTCCTTTACCTTACACATAATCACTACACCAACAACGCTTCTACTCTTGCCCT

AACATCAAACATTATCGGCGGTTGGGGGGGACTAAACCAAACCCAATA---

>ZM146\_Protoblepharus\_sp.nov.

CTCT

ACTAATGAATCCCATTATAACCTCACTGATCTTGTCAAGCCTTGCTTTAGGCACAATTAT  
CACAATATCAAGTTATCACTGACTCCTAGCCTGAATTGGACTAGAACTAAATACACTAGC  
GATTATTCCTCTTATCGCAAACAACACCACCCACGAGCAACCGAAACCGCAACGAAATA  
CTTCCTCATCCAAGCTGCAGCCTCAGCAACAC

>ZM145\_Protoblepharus\_sp.nov.

CTCTACTAATGAATCCCATTATAACCTCACTGATCTTGTCAAGCCTTGCTTTAGGCACAATTAT

CACAATATCAAGTTATCACTGACTCCTAGCCTGAATTGGACTAGAACTAAATACACTAGC  
GATTATTCCTCTTATCGCAAACAACACCACCCACGAGCAACCGAAACCGCAACGAAATA  
CTTCCTCATCCAAGCTGCAGCCTCAGCAACAC

>NAP-6640\_Scincella\_melanosticta

CTCTACTAATGAACCCAATTATAACCTCTTTAATTATTTCTAGCCTAGCCCTGGGCACAATGAT  
TACAATATCAAGCTTCCACTGACTCCTAGCCTGAATTGGACTAGAGTTAAATACTATTGC  
CATCCTACCCATCATTGCAAACAACACCACCCCGATCAACAGAGGCCACTACCAAATA  
CTTCCTAACCCAAGCAGCCGCCTCAGCTACCGTACTATTTGCCAGCACAATCAATGCCTG  
ATCTACCGGGACCTGAGACATTACAACTTACAAACCAACCGCCTCCATTATACTTAC  
AATAGCCCTAGCAATAAACTAGGGCTAGCCCCACTACACTTCTGACTTCCAGAAGTACT  
ACAAGGCTCACCATTAACAAACAGCATTAAATTATTACCACCTGACAAAACTGGCCCTAT  
AGCCCTATTATTCCTAACCTATAACTCACTACACCCACAACACTGCTCGCAATAGGACT  
ACTATCAACCGTAACCGGAGGATGGGGCGGCCTCAACCAAACCCAACAA---

>NAP-1331\_Scincella\_doriae

CTCTACTAATGAACCTATTATAATATCTCTAATCATTTCAGCCTTGCTCTTGGAACCATCAT  
CACAATGTCCAGCTTTCACTGATTACTTGCCTGAATTGGACTAGAACTTAATACCCCTCGC  
TATTATTCATTAATTGCAAACAACACCATCCCCGTGCAACAGAAGCAGCCACAAAATA  
CTTCTTAATCAAGCAGCAGCTTACAGCTACCATTTTATTTTCAAGCACCAACGCTTG  
ATCCACGGGATCATGAGACATCCTACAAATAACAAACCAACCGCTACTATTATACTCAC  
TATAGCACTAACATAAACTAGGCCCTGCCCCCTACACTTTTGATTACCAGAGGACT  
ACAAGGAACACCCTTAAAAACAGCATTAGTTATCACACCTGACAAAACTCGCACCTAT  
GACCCTTTTTTATTGGTTTACCCCACTAAGCCCTACAACACTTTTATTAGTAGGACT  
ACTCTCAACCGCATTGGCGGCTGAGGCGGCCTAAACCAAACCCAACAC---

>NAP-6376\_Scincella\_rupicola

CTCT

ACTAATGAACCCCTTTATAATATCCCTGATTATTTGAGCCTTGCCCTTGGCACCCCTAAT  
CACAATAACAAGCTTTCACTGGTTTCTCGCCTGAGTGGGACTAGAACTTAATACCCCTCGC  
TATTATCCCTATTATCGCAAACAACACCACCCACGAGCAACTGAAGCCGCCACAAAATA  
CTTCTTAATCCAGGCAGCAGCCTCGGCCACTGTACTTTTTTCAAGCGCCACTAATGCCTG  
ACACACGGGCTCTTGGGATATTATACTAATAACAAATCAACCAGCAAGCATTATATTAAC  
TATGGCCCTGGCCATAAACTGGGCCTGCCCCCTACACTTCTGGCTCCCAGAGGTCTT  
ACAAGGCGCCTCTTTAAAAACAGCCTTAATCATTGTTACCTGACAAAACTAGCACCCCT  
CGCCCTCTTTCTAATAGTTTACCCTACATTAACCCGACAACCCTCTTAATAATGGGACT  
CTTATCAACCCTGGTGGGGGGATGAGGGGGCCTAAACCAAACCCAACAC---

>BAM-36\_Ablepharus\_deserti

TCTCCAGTAAGTCTGCGGGTGAATTCCAGACTGTTGGTAAGAGCACCGCTGCATCAAAT  
AACTCTGAAGCAAGGAATGTAAGCCAGAAGTAGATG--GGAAA

GAGAGGGAGAA--CCCCAACCCACCGCTACAATTCCTGTTGCA  
GAAAGTGCCTAAAAACCGAAATGGCTGAAAATGCCAGAGCAGCATGGTGGATAACAAA  
TGGAAGCCGCTCCAAGGTGTCGGGAATCTCCAGGGGGCTGTTGCAGCTGCAGCGGCTGCC  
AAT-CCTTTAGAAGCCAAAAACGTGGCATCCTCATCCTCCGAATCAAAACCA  
CAAGGCTTAAGGATAGAGATTAAGAGCAAAAACAAAATCAGACCAGGCTCTCTGTTTAT  
GAAGTTAGAAAAGACGGCAAGGCTCAATCGGCGGCCAAGAAACCGCGAGAGCTCCAGTGAG  
GAGGATTCTCCTGCACGAGAGAACAGCCCGTCCAGGAGCCGCAGCCGGTACGCGGCTAAA  
TCGGATCCTAAATCCAGGCACAGAACAAGATCCCTCTCTACAGTCACTCAAG

>BAM-15\_Asymblepharus\_ eremchenoi

TCTCCAGTAAGTCTGAAGGTGAGCTTCCAGACTGTTGGTAAGAGCACCGCTGCATCAAAT  
AACTCTGAAGCAAGGAATGCAAAGCCAGAAGTAGATGCGAAAAGAAATTGGCTGATGTAAAA  
GAGAGCAAAAAAGAGAGGGAGAAACCAAGCCCAACCCACCGCTACAATTCCTGTTGCA  
GAAAGTGCCTAAAAACCGAAATGGCTGAAAATGCCAGTGCACCATGGTGGATAACAAA  
TGGAAGCCGCTCCAGGGTGTGCGAAATCTCCAGGGGGCTGTTGCAGCTGCAGCAGCTGCC  
AAT-CCTTTAGAAGCCAAAAACGCGGCATCCTCATCCTCCGAATCAAAACCA  
CAAGGTTTAAGGATAGAAATTAAGAGCAAAAACAAAATCAGGCCAGGCTCTCTGTTTAT  
GAAGTTAGAAAAGACGGCAAGGCTCAATCGGCGGCCAAGAAACCGCGAGAGCTCCAGTGAG  
GAGGATTCTCCTGCACGAGAGAACAGCCCGTCCAGGAGCCGCAGCCGGTACGCGGCTAAA  
TCGGATCCTAAATCTAGGCACAGAACAAGATCCCTCTCTATAGTCACTCAAG

>BAM-135\_Asymblepharus\_ alaicus

TCTCCAGTAAGTCTGAAGGTGAGCTTCCAGAGTGTGGTAAGAGCACCGCTGCATCAAAT  
AACTCTGAAGCAAGGAATGCAAAGCCAGAAGTAGACGCGAAAAGAAATTGGCTGATGTGAAA  
GAGAGCAAAAAAGAGAGGGAGAAACCAAGCCCAACCCACCGCTACAATTCCTGTTGCA  
GAAAGTGCCTAAAAACCGAAATGGCTGAAAATGCCAGAGCAGCATGGTGGATAACAAA  
TGGAAGCCACTCCAGGGTGTGGAATCTCCAGGGGGCTGTTGCAGCTGCAGCAGCTGCC  
AAT-CCTTTAGAAGCCAAAAACGCGGCATCCTCATCCTCCGAATCAAAACCA  
CAAGGTTTAAGGATAGAAATTAAGAGCAAAAACAAAATCAGGCCAGGCTCTCTGTTTAT  
GAAGTTAGAAAAGACGGCAAGGCTCAATCGGCGGCCAAGAAACCGCGAGAGCTCCAGTGAG  
GAGGATTCTCCTGCACGAGAGAACAGCCCGTCCAGGAGCCGCAGCCGGTACGCGGCTAAA  
TCGGATCCTAAATCTAGGCACAGAACAAGATCCCTCTCTATAGTCACTCAAG

>NAP-9807\_Asymblepharus\_ mahabharatus

TCCCCAGTAAGTCTGAAGGTGAACTTCCAGACTGCTGGCAAGAGCACCGCTGCATCGAAT  
AACTCCGAAGCAAGGAATGCAAAGCCACAAGTAGATGCGAAAAGAACTGGCTGATGTGAAA  
GAGAGCAAAAAGAGA---GAGGAAACCAAGCCCAACTCCACCGCTACAATTCCTGTGGCA  
GAAAGTGGGCTAAAAACTGAAATGGCTGAAAATGCCAGAGCAGCTTGGTGGATAACAAA  
TGGAAGCCGCTCCAGGGTGTGCGGAATCTCCAGGGGGCTGTTGCAGCAGCAGCTGCTGCC  
AAT-CTTTAGAAGCCAAAAACGAGCATCCTCATCCTCCGAATCAAGACCA  
CAGGGCCTAAGGATAGAAATTAAGAGCAAAAACAAAATCAGGCCAGGCTCTCTGTTTAT  
GAAGTCAGAAAAGACGGCAAGGCTCAATCGGCGGCCAAGAAACCGCGAGAGCTCCAGTGAG  
GAGGATTCTCCTGCCCAGAGAGAACAGCCCTCCAGTAGCCGCAGCCGGTACGCGGCGAAA  
TCGGATCCCAAATCCAGACACAGAACAAGATCCCTCTCTATAGTCACTCAAG

>NAP-9870\_Asymblepharus\_ nepalensis

TCTCCAGTAAGTCTGAAGGTGAACTTCCAGACTGCTGGTAAGAGCACCGCTGCATCAAAT  
AACTCTGAAGCAAGGAATGCAAAGCCAGAAGTAGATGGAAAAGAAATTGGCTGATGGGAAA  
GAGAGCAAAAAAGAGAGGGAGAAACCAAGCCCAACCCAGCGCTACAATTCCTGTTGCA  
GAAAGTGTGCTAAAAACTGAAATGGCTGAAAATGCCAGAGTAGCATGGTGGATAACAAA  
TGGAAGCCGCTCCAGGGTGTGCGGAATCTCCAGGGGGCTGTTGCAGCTGCAGCAGCTGCC  
AAT-CCTTTAGAAGCCAAAAACGCGGCATCCTCATCCTCTGAATCAAGACCA  
CAAGGCTTAAGGATAGAAATTAAGAGCAAAAACAAAATCAGGCCAGGCTCTCTGTTTAT

GAAGTTAGAAAGACGGCAAGGCTCAATCGGCGGCCAAGAAACCGCGAGAGCTCCAGTGAG  
GAGGATTCTCCTGCACGAGAGAACAGCCCCTCCAGGAGCCGCAGCCGGTCACGGGCGAAA  
TCGGATCCTAAATCCAGGCACAGAACAAGATCCCTCTCCTATAGTCACTCAAG

>NAP-9840\_Asymblepharus\_sikkimensis\_2

TCTCCAGTGGGTCTGAAGGTGAACCTCCAGACTGTTGGTAAGAGCACCGCTGCATCAAAT  
AACTCTGAAGCAAGGAATGCAAAGCCAGGAGTAGATGCGAAAGAATTGGCTGATGTGAAA  
GAGAGCAAAAGAGAGAGG---AAACCAAGCCCCAACCCCACCGCTACAATTCCTGCTGCA  
GAAAGTGTGCTAAAAACGGAATGGCTGAAAATGCCAGAGCAGCGTGGTGGATAACAAA  
TGGAAGCCGCTCCAGGGTGTGCGGAATCTCCAGGGGGCTGTTGCAGCAGCAGCCGCTGCC  
AAT-CTTTTTGAAGCAAAAACGCAGCATCCTCATCCTCCGAATCAAGGCCA  
CAAGGCTTAAGGATAGAAATTAAGCAAAAACAAAATCAGGCCAGGCTCTCTGTTTGAT  
GAAGTCAGAAAGACGGCAAGGCTCAATCGGCGGCCAGAAACCGCGAGAGCTCCAGTGAG  
GAGGATTCTCCTGCACGAGAGAACAGCCCCTCCAGTAGCCGCAGCCGGTCACGGGCGAAA  
TCGGATCCTAAATCCAGGCACAGAACAAGATCCCTCTCCTATAGTCACTCAAG

>NAP-9816\_Asymblepharus\_sikkimensis\_3

TCTCCAGTGGGTCTGAAGGTGAACCTCCAGACTGCTGGTAAGAGCACCGCTGCATCAAAT  
AACTCTGAAGCAAGGAATGCAAAGCCCGGAGTAGATGCGAAAGAATTGGCTGATGTGAAA  
GAGAGCAAAAGAGA---GAGGAAACCAAGCCCCAACCCCACCGCTACAGTTCCTGCTGCA  
GAAAGTGTGCTAAAAACGGAATGGCTGAAAATGCCAGAGCAGCGTGGTGGATAACAAA  
TGGAAGCCGCTCCAGGGTGTGCGGAATCTCCAGGGGGCTGTTGCAGCAGCAGCCGCTGCC  
AAT-CTTTTTGAAGCAAAAACGCAGCATCCTCATCCTCCGAATCAAGGCCA  
CAAGGCTTAAGGATAGAAATTAAGCAAAAACAAAATCAGGCCAGGCTCTCTGTTTGAT  
GAAGTCAGAAAGACGGCAAGGCTCAATCGGCGGCCAGAAACCGCGAGAGCTCCAGTGAG  
GAGGATTCTCCTGCACGAGAGAACAGCCCCTCCAGTAGCCGCAGCCGGTCACGGGCGAAA  
TCGGATCCTAAATCCAGGCACAGAACAAGATCCCTCTCCTATAGTCACTCAAG

>NAP-9858\_Asymblepharus\_sikkimensis\_1

TCTCCAGTGGGTCTGAAGGTGAACCTCCAGACTGCTGGTAAGAGCACCGCTGCATCAAAT  
AACTCTGAAGCAAGGAATGCAAAGCCAGGAGTAGATGCGAAAGAATTGGCTGATGTGAAA  
GAGAGCAAAAGAGA---GAGGAAACCAAGCCCCAACCCCACCGCTACAATTCCTGCTGCA  
GAAAGTGTGCTAAAAACGGAATGGCTGAAAATGCCAGAGCAGCGTGGTGGATAACAAA  
TGGAAGCCGCTCCAGGGTGTGCGGAATCTCCAGGGGGCTGTTGCAGCAGCAGCCGCTGCC  
AAT-CTTTTTGAAGCAAAAACGCAGCATCCTCATCCTCCGAATCAAGGCCA  
CAAGGCTTAAGGATAGAAATTAAGCAAAAACAAAATCAGGCCAGGCTCTCTGTTTGAT  
GAAGTCAGAAAGACGGCAAGGCTCAATCGGCGGCCAGAAACCGCGAGAGCTCCAGTGAG  
GAGGATTCTCCTGCACGAGAGAACAGCCCCTCCAGTAGCCGCAGCCGGTCACGGGCGAAA  
TCGGATCCTAAATCCAGGCACAGAACAAGATCCCTCTCCTATAGTCACTCAAG

>NC054206\_Scincella\_reevesii

TCCCCAGTAAGTCTGAAGGTGAACCTCCAGGCTGCTGGCAAGAACTCCAATGCATCAAAT  
AACTCTGAAGCAGGGCGTGCCAAGCAA---GAATTGGTTGGTGTGAAA  
GGGAGCAGAAAAGAGAGGGGAAAACAAGGCCAGCCCCACTGCTGCAACTACTGTTGCA  
GAAAGTGTGCCAAAACGGACATGGCGGAAAATGCCAGAGCAGCCTGGTGGATAAGAAA  
TGGAAGCCACTGCAGGGTGTGGGAATCTCCAGGTGGCTGCAGCAGCTGCAGCAGCTGCT  
AAC-CCTGTGAAGCAAAAACATGGCATCATGTCT---GACTCCAAACCA  
CCAGGCTTAAGGATTGAGATCAAAGCAAAAACAAAATTAGACCAGGCTCTCTGTTTGAT  
GAAGTTAGAAAGACAGCCAGACTCAATCGGAGACCAAGAAACCGGGAGAGCTCCAGTGAG  
GAGGATTGCCTGCACGAGAGAACAGCCAGTCCAGGAGCCGCAGCCGGTCACGGAGCAAA  
TCGGCTCCTAAACCCAGGCACAGAACAAGTTCCTCCTACAGTCACTCAAG

>zeeshan\_ZM146rag\_rag1-F



TGACGCAGCCAGATGGCTAGCCACGATAAAGGGAATGGGGCCGATTCCCTGGACAAAGCCTCCGAGGAACAGGA  
AGATGCAGTGGGCTTAAGGTCACAAGACCCCTTTCGAATAGACCGAGAGCGGAACACTGTTGTGGAGGCGAGAG  
ATAAAGATGCCTTTCGTGTGAACCTAAGAGAGGATGAAGCTCACCAAGCAAAGCTGCAGCACCTCTGTGCAATCT  
GTGGAGGCTCATTTAAACTGACCCTTATAAGAGAAGCCACCCTGTGCATGGACCAGTGGATAATTTGATGCAGG  
CCCTACTGAGAAAGAAGGAGAAAAGGGCAACATCTTGGCCAGAACTTCTTGCCAGGATTTTTAAGATTGATGTCA  
GAGGAGACAATGATACCATCCATCCCCTAACTTTTGCCACAACCTGCTGGAACGTGATTCAGAGGAAATTCAGCAA  
TGTCCTTGTGAAATGTATTTTCCAAGGAAAGGCGCTGTGGAGTGGCATCCCCATTCATCCAGTTGTGATGTTTGT  
GGCACTTTATCCCGGGGGGTCAAGAGAAAGTGGCCAGCCCTGAATCCACAAGTGATCAAAAAAATCAGGATCCTC  
GCCAGACCTGGTAGACAAACAAGGCAGGTAAAGAACCCCAAACAAGGGAATAGCAAAAGTCTCATGAAAAAGAT  
TGCAAACTGCAACAAGATACATCTCAGTACAAAGAGCTTTGCAGTGGACTATCCTGCCGACTTTGTGAAATCTGTC  
TCTTGCCAGATCTGTGAGCACATCCTGTGAGACCCGGTAGAAACAACATGCAAGCACTTATTCTGCAGAGTTTGCA  
TCCTGAAATGCCTCAAAGTACTGGGAAGCTACTGCCCCAGTTGCCGCTATCCTTGCTTCCCTACTGATCTTGTGAGC  
CCCGTAAAATCCTTCTGAGCATCCTCAACAATTTGGCAGTGAGATGTCCTGTGAAAGAGTGTGATGAGGAAATCG  
CTCTGGAAAAATACTGCCGTCATCTTTCTACCCACAAAGAAGCAAAGGACAAAGAA

>zeeshan\_ZM145rag\_rag1-F

TGACGCAGCCAGATGGCTAGCCACGATAAAGGGAATGGGGCCGATTCCCTGGACAAAGCCTCCGAGGAACAGGA  
AGATGCAGTGGGCTTAAGGTCACAAGACCCCTTTCGAATATACCGAGAGCGGAACACTGTTGTGGAGGCGAGAG  
ATAAAGATGCCTTTCGTGTGAACCTAAGAGAGGATGAAGCTCACCAAGCAAAGCTGCAGCACCTCTGTGCAATCT  
GTGGAGGCTCATTTAAACTGACCCTTATAAGAGAAGCCACCCTGTGCATGGACCAGTGGATAATTTGATGCAGG  
CCCTACTGAGAAAGAAGGAGAAAAGGGCAACATCTTGGCCAGAACTTCTTGCCAGGATTTTTAAGATTGATGTCA  
GAGGAGACAATGATACCATCCATCCCCTAACTTTTGCCACAACCTGCTGGAACGTGATTCAGAGGAAATTCAGCAA  
TGTCCTTGTGAAATGTATTTTCCAAGGAAAGGCGCTGTGGAGTGGCATCCCCATTCATCCAGTTGTGATGTTTGT  
GGCACTTTATCCCGGGGGGTCAAGAGAAAGTGGCCAGCCCTGAATCCACAAGTGAGCAAAAAAATCAGGATCCTC  
GCCAGACCTGGTAGACAAACAAGGCAGGTAAAGAACCCCAAACAAGGGAACAGCAAAAGTCTCATGAAAAAGAT  
TGCAAACTGCAACAAGATACATCTCAGTACAAAGAGCTTTGCAGTGGACTATCCTGCCGACTTTGTGAAATCTGTC  
TCTTGCCAGATCTGTGAGCACATCCTGTGAGACCCGGTAGAAACAACATGCAAGCACTTATTCTGCAGAGTTTGCA  
TCCTGAAATGCCTCAAAGTACTGGGAAGCTACTGCCCCAGTTGCCGCTATCCTTGCTTCCCTACTGATCTTGTGAGC  
CCCGTAAAATCCTTCTGAGCATCCTCAACAATTTGGCAGTGAGATGTCCTGTGAAAGAGTGTGATGAGGAAATCG  
CTCTGGAAAAATACTGCCGTCATCTTTCTACCCACAAAGAAGCAAAGGACAAAGAA
