# Supplementary material for: A new ancient lineage of ablepharine skinks (Sauria: Scincidae) from eastern Himalayas with notes on origin and systematics of the group
Source: PeerJ. 2022 Jan 18;10:e12800. doi: 10.7717/peerj.12800 (PMC8781319; doi:10.7717/peerj.12800)
Supplement: Supplemental Information 3 [file peerj-10-12800-s003.xlsx]

## Sheet: ALL
Sample ID	Species	Country	Locality	ND2	Cytb	16S	12S	MCR1	NKTR	N	E
NHMC80.3.131.57	Ablepharus anatolicus	Turkey	Dalaman, Mugla	MZ848096	KX591425	KX591462.	MZ827906	KX591367	KX591533	36.76	28.80
NHMC80.3.131.8	Ablepharus budaki	Syria	Alawit Mt.	-	AY561373	AY561427	MZ827907	KX591382	KX591546	34.82	36.37
NHMC80.3.79.35	Ablepharus chernovi	Turkey	Beysehir, Konya	-	JX847569	JX847534	-	KX591396	KX591560	37.67	31.72
ZMMU R-15790	Ablepharus deserti	Kyrgyzstan	Suzak	MZ820278	MZ820263	MZ790580	MZ790568	MZ820236	MZ820242	40.85	73.1
ZMMU R-16815	Ablepharus kitaebelii	Greece	Kardamali	MZ820275	MZ820260	MZ790577	MZ790565	-	-	39.62	19.88
NHMC80.3.82.2	Ablepharus kitaibelii	Greece	Olympos Mt.	MZ848097	AY561326	AY561380	MZ827908	KX591313	KX591479	40.07	22.38
R-14554	Ablepharus pannonicus	Uzbekistan	Khasyanata	MZ820287	MZ820272	MZ790584	MZ790575	-	-	39.89	68.21
NHMC80.3.169.6	Ablepharus rueppellii	Israel	Buregin	MZ848098	KX591436	KX591472	MZ827909	KX591398	KX591562	31.63	34.96
ZMMU R-15815	Asymblepharus alaicus	Kyrgyzstan	Ala-Archa	MZ820276	MZ820261	MZ790578	MZ790566	MZ820237	MZ820243	42.56	74.48
ZMMU R-15770	Asymblepharus eremchenkoi	Kyrgyzstan	Chichkan	MZ820277	MZ820262	MZ790579	MZ790567	MZ820238	MZ820244	42.11	72.8
MN885892	Asymblepharus himalayanus	China	Tibet	MN885892	MN885892	MN885892	MN885892	-	-	-	-
KIZ015959	Asymblepharus ladacensis	China	Tibet	MW111453	-	-	MZ790569	-	-	-	-
ZMMU R-16812	Asymblepharus mahabharatus	Nepal	Gadawari	MZ820282	MZ820267	MZ790598	MZ790570	MZ820239	MZ820245	27.6	85.39
AY607282	Asymblepharus mahabharatus	China	Tibet, Xigaze, Zhangmu (Khasa)	AY607282	-	-	MZ790564	-	-	27.98	85.98
ZMMU R-16813	Asymblepharus nepalensis	Nepal	Naudanda	MZ820286	MZ820271	MZ790602	MZ790574	MZ820240	MZ820246	28.28	83.87
ZMMU R-16810	Asymblepharus sikkimensis	Nepal	Chomrung	MZ820283	MZ820268	MZ790601	MZ790573	-	MZ820247	28.43	83.82
ZMMU R-16811	Asymblepharus sikkimensis	Nepal	Damphus	MZ820284	MZ820269	MZ790600	MZ790572	-	MZ820248	28.31	83.82
ZMMU R-16814	Asymblepharus sikkimensis	Nepal	Gadawari	MZ820285	MZ820270	MZ790599	MZ790571	-	MZ820249	27.58	85.39
KIZ011087	Protoblepharus medogensis	China	Tibet, Medog	MW111454	-	-	-	-	-	29.97	95.17
KIZ032534	Protoblepharus nyingchiensis	China	Nyingchi	KIZ032534	-	-	-	-	-	29.66	95.49
KIZ019518	Protoblepharus nyingchiensis	China	Nyingchi	MW111452	-	-	-	-	-	29.66	95.49
KIZ06682	Protoblepharus nyingchiensis	China	Nyingchi	KIZ06682	-	-	-	-	-	29.66	95.49
BNHS 2853	Protoblepharus apatani sp.nov.	India	Arunachal Pradesh, Talle	MZ820288	MZ820273	MZ790586	MZ790576	-	-	27.55	93.9
NCBS NRC-AA-0017	Protoblepharus apatani sp.nov.	India	Arunachal Pradesh, Talle	MZ820289	MZ820274	MZ790585	-	-	-	27.55	93.9
AY662549	Scincella "A. sikimmensis"	China	Tibet	AY662549	-	-	-	-	-	-	-
NAP-01331	Scincella cf. doriae	Vietnam	Lam Dong, Bidoup - Nui Ba	MZ820279	MZ820264	MZ790581	-	-	-	12.07	108.66
NAP-06640	Scincella cf. melanosticta	Thailand	Tak, Umphang	MZ820281	MZ820266	MZ790583	-	-	-	16.24	98.97
NAP-06376	Scincella cf. rupicola	Vietnam	Gia Lai, Kon Chu Rang N.P.	MZ820280	MZ820265	MZ790582	-	-	-	14.5	108.54
NC030779	Scincella huanrenensis	Korea	-	NC030779	NC030779	NC030779	NC030779	-	-	-	-
MN702771	Scincella modesta	China	-	MN702771	MN702771	MN702771	MN702771	-	-	-	-
NC054206	Scincella reevesii	China	-	NC054206	NC054206	NC054206	NC054206	MZ820241	MZ820250	-	-
NC030776	Scincella vandenburghi	Korea	-	NC030776	NC030776	NC030776	NC030776	-	-	-	-
NC041124	Sphenomorphus incognitus	China	-	NC041124	NC041124	NC041124	NC041124	-	-	-	-
NC045408	Sphenomorphus indicus	China	-	NC045408	NC045408	NC045408	NC045408	-	-	-	-
MN977920	Tropidophorus hangnam	Thailand	Chaiyaphum	MN977920	MN977920	MN977920	MN977920	-	-	-	-
NC041147	Isopachys gyldenstolpei	Thailand	Prachuap Khiri Khan	NC041147	NC041147	NC041147	NC041147	-	-	-	-
NC029352	Plestiodon chinensis	China	-	NC029352	NC029352	NC029352	NC029352	-	-	-	-
NC024576	Plestiodon elegans	China	-	NC024576	NC024576	NC024576	NC024576	-	-	-	-
MT662111	Plestiodon liui	China	-	MT662111	MT662111	MT662111	MT662111	-	-	-	-
MW327509	Ateuchosaurus chinensis	China	-	MW327509	MW327509	MW327509	MW327509	-	-	-	-

## Sheet: SELECTED
Номер	Вид	Country	Locality	Cytb	16S	MCR1	NKTR
EPR-5356	Ab. bivittatus	Iran	Rafsanjan	+	+	+	+
EPR-5096	Ab. bivittatus	Iran	East Azerbaijan	+	+	+
ABIV-2	Ab. bivittatus	Armenia	-	+	+	+
SNL-46	A. anatolicus 2	Turkey	Alania	+	+	+	+
DJ-6831	Ab. budaki 3	Lebanon	Ariz	+	+	+	+
DJ-6830	Ab. budaki 3	Lebanon	Ariz	+	+	+	+
BAM-36	Ab. deserti	Kyrgyzstan	Suzak	+	+	+	+
BAM-31	Ab. deserti	Kyrgyzstan	Suzak	+	+	+	+
BAM-12	Ab. deserti	Kyrgyzstan	Chichkan	+	+	+	+
BAM-130	Ab. deserti	Kyrgyzstan	Jel-Aryk	+	+	+	+
BAM-1111	Ab. kitaibelii	Greece	Kardamali	+	+	+	+
DJ-6381	Ab. kitaibelii	Greece	Corfu	+	+	+	+
R-15583	Ab. pannonicus 2			+	+	+
R-14554	Ab. pannonicus 2	Uzbekistan	Khasyanata	+	+
DJ-7641	Ablepharus sp. 4	Pakistan	Lal Qilla	+	+
DJ-6809	Ab. rueppellii	Lebanon	Maad	+	+	+	+
DJ-2477	Ab. rueppellii	Israel	Dimona	+	+	+	+
R-12276	Ablepharus sp. 1	Uzbekistan	Khiva	+	+
RAN-9999	Ablepharus sp. 1	Uzbekistan	Kokand	+	+	+	+
EPR-1508	Ablepharus sp. 2	Iran	Shiraz	+	+	+	+
EPR-1507	Ablepharus sp. 2	Iran	Shiraz	+	+	+	+
EPR-1506	Ablepharus sp. 2	Iran	Shiraz	+	+	+	+
DJ-7015	Ablepharus sp. 2	Iran	Kermanshah	+	+	+	+
DJ-7017	Ablepharus sp. 3	Oman	Wadi Muaiden	+	+	+	+
EPR-4882	A. grayanus 1	Iran	Sistan - Balochestan, Saravan	+	+
EPR-5353	A. grayanus 2	Iran	Kerman, Rafsanjan	+	+
DJ-4002	As. alaicus alaicus	Kyrgyzstan	Kazarman	+	+	+	+
BAM-114	As. alaicus alaicus	Kyrgyzstan	Uch-Tyube	+	+	+	+
BAM-94	As. alaicus alaicus	Kyrgyzstan	Kadamjai region	+	+	+	+
BAM-86	As. alaicus alaicus	Kyrgyzstan	Darout-Kurgan	+	+	+	+
BAM-80	As. alaicus alaicus	Kyrgyzstan	Darout-Kurgan	+	+	+	+
SNL-568	As. alaicus alaicus	Kyrgyzstan	Ali-Utek	+	+	+	+
BAM-135	As. alaicus yakovlevae	Kyrgyzstan	Ala-Archa	+	+	+	+
RAN-8888	As. alaicus yakovlevae	Uzbekistan	Zarafshan	+	+	+	+
BAM-124	As. alaicus kucenkoi	Kyrgyzstan	Sary-Kamish	+	+	+	+
DJ-5275	As. alaicus yakovlevae	Kazakhstan	Almaty	+	+	+	+
BAM-132	As. eremchenkoi	Kyrgyzstan	Kara-Buura	+	+	+	+
BAM-15	As. eremchenkoi	Kyrgyzstan	Chichkan	+	+	+	+
SNL-790	As. himalayanus	India	Manali	+	+	+	+
SNL-789	As. himalayanus	India	Batsari	+	+	+	+
SNL-373	As. himalayanus	India	Ful Chatn	+	+	+	+
SNL-810	As. ladacensis 1	India	Komik	+	+	+	+
SNL-809	As. ladacensis 1	India	Komik	+	+	+	+
SNL-817	As. ladacensis 2	India	Chitkul	+	+	+	+
SNL-816	As. ladacensis 2	India	Chitkul	+	+	+	+
SNL-TIB	As. ladacensis 3	China	Baidengpo	+	+	+	+
NAP-09807	As. mahabharatus	Nepal	Gadawari	+	+	+	+
NAP-09815	As. mahabharatus	Nepal	Gadawari	+	+	+	+
NAP-09872	As. nepalensis	Nepal	Phedi	+	+	+
NAP-09871	As. nepalensis	Nepal	Phedi	+	+	+	+
NAP-09870	As. nepalensis	Nepal	Naudanda	+	+	+	+
NAP-09861	As. sikkimensis 1	Nepal	Komrong Danda	+	+		+
NAP-09858	As. sikkimensis 1	Nepal	Chomrung	+	+		+
NAP-09840	As. sikkimensis 2	Nepal	Damphus	+	+	+	+
NAP-09816	As. sikkimensis 3	Nepal	Gadawari	+	+		+
NAP-09814	As. sikkimensis 3	Nepal	Gadawari	+	+		+
SNL-377	Asymblepharus sp. 1	India	Seven Lakes	+	+	+	+
SNL-374	Asymblepharus sp. 1	India	Dhorali	+	+	+	+
SNL-CAP	Asymblepharus sp. 2	Nenal	Piple	+	+	+	+
INDO219	Asymblepharus sp. 2	India	Dehradun	+	+	+	+
DJ-7640	Asymblepharus cf. tragbulensis	Pakistan	Kumrat	+	+	+	+
DJ-7639	Asymblepharus cf. tragbulensis	Pakistan	Kumrat	+	+	+	+
SNL-812	Asymblepharus sp. 3	India	Naragan Waterfall	+	+	+	+
SNL-379	Asymblepharus sp. 3	India	Dhorali	+	+	+	+
SNL-378	Asymblepharus sp. 3	India	Seven Lakes	+	+	+	+
SNL-254	Asymblepharus sp. 4	India	Sonamarg	+	+		+
SNL-247	Asymblepharus sp. 4	India	Sonamarg	+	+
SNL-156	Asymblepharus sp. 4	India	Gulmarg	+	+	+	+
SNL-157	Asymblepharus sp. 4	India	Gulmarg	+	+	+	+
NAP-01331	Scincella cf. doriae	Vietnam	Lam Dong, Bidoup	+	+	+	+
NAP-06376	Scincella rufocaudata	Vietnam	Gia Lai, Kon Chu Rang N.P.	+	+	+	+
NAP-03571	Scincella cf. reevesi	Vietnam	Cat Ba	+	+	+	+
NT00648	Scincella cf. melanosticta	Cambodia		+	+	+	+
NAP-06640	Scincella sp.	Thailand	Tak, Umphang	+	+	+	+
NAP-06427	Scincella sp.	Vietnam	Kon Tum, Kon Plong District	+	+	+	+
NHMC80.3.82.2	A. kitaibelii kitaibelii	GENBANK		+	+	+	+
NHMC80.3.82.33	A. kitaibelii kitaibelii	GENBANK		+	+	+	+
NHMC80.3.82.57	A. kitaibelii kitaibelii	GENBANK		+	+	+	+
NHMC80.3.82.78	A. kitaibelii kitaibelii	GENBANK		+	+	+	+
NHMC80.3.82.47	A. kitaibelii fabichi	GENBANK		+	+	+	+
NHMC80.3.82.175	A. kitaibelii kitaibelii	GENBANK		+	+	+	+
NHMC80.3.82.204	A. kitaibelii fitzingeri	GENBANK		+	+	+	+
NHMC80.3.82.226	A. kitaibelii stepaneki	GENBANK		+	+	+	+
NHMC80.3.82.18	A. anatolicus 1	GENBANK		+	+	+	+
NHMC80.3.131.57	A. anatolicus 1	GENBANK		+	+	+	+
NHMC80.3.131.60	A. anatolicus 1	GENBANK		+	+	+	+
NHMC80.3.131.3	Ab. budaki_4	GENBANK		+	+	+	+
NHMC80.3.131.48	Ab. budaki_2	GENBANK		+	+	+	+
NHMC80.3.131.8	Ab. budaki_1	GENBANK		+	+	+	+
NHMC80.3.131.12	Ab. budaki_1	GENBANK		+	+	+	+
NHMC80.3.82.177	A. chernovi 3	GENBANK		+	+	+	+
NHMC80.3.79.25	A. chernovi 3	GENBANK		+	+	+	+
NHMC80.3.79.32	A. chernovi 3	GENBANK		+	+	+	+
NHMC80.3.79.35	A. chernovi 1	GENBANK		+	+	+	+
NHMC 80.3.79.1	A. chernovi 2	GENBANK		+	+	+	+
NHMC80.3.169.5	A. rueppellii 1	GENBANK		+	+	+	+
NHMC80.3.169.75	A. rueppellii 2	GENBANK		+	+	+	+
NHMC80.3.173.1	A. pannonicus 1	GENBANK		+	+	+	+
NHMC80.3.173.4	A. pannonicus 1	GENBANK		+	+	+	+
E111036	Eutropis multifasciata	GENBANK		+	+	+
E8121.9	Chalcides striatus	GENBANK		+	+	+
Z98037	Chalcides viridanus	GENBANK		+	+
MVZ:235855	Chalcides sphenopsiformis	GENBANK		+	+
AY217824	Scelotes montispectus	GENBANK		+	+		+
FJ972224	Acontias meleagris	GENBANK		+	+		+
EU116515	Trachylepis quinquetaeniata	GENBANK		+	+		+
DQ241592	Plestiodon fasciatus	GENBANK		+	+		+
AY217822	Scincus scincus	GENBANK		+	+		+
FJ972225	Feylinia polylepis	GENBANK		+	+		+
AY802769	Amphiglossus melanopleura	GENBANK		+	+		+
